# Supplementary material for: Lipid profiling in serum from apolipoprotein E-knock out mice fed with different diets and its application to the study of the regulatory effect on lipid metabolism
Source: Royal Society of Chemistry journal article supplement (doi:10.1039/c8fo01076e), 2018-01-01
Supplement: c8fo01076e1.pdf [file c8fo01076e1.pdf]

Electronic Supplementary Material (ESI) for Food & Function.  
This journal is © The Royal Society of Chemistry 2018

**Lipids profiling in serum from apolipoprotein E-knock out mice fed with different diets and its application on the  
research of regulatory effect on lipid metabolism**

**Zongyuan Wu<sup>1#</sup>, Zumeng Xia<sup>2##</sup>, Bangfu Wu<sup>1</sup>, Fang Wei<sup>1\*</sup>, Xin Lv<sup>1</sup>, Ya Xie<sup>1</sup>, Shuling Xu<sup>1</sup>, Jiqu Xu<sup>1</sup>,  
Hong Chen<sup>1</sup>, Fenghong Huang<sup>1</sup>**

**Table of contents:**

- 1) Fig S1-S2
- 2) Table S1-S15

Fig S1 The PCA of QC samples

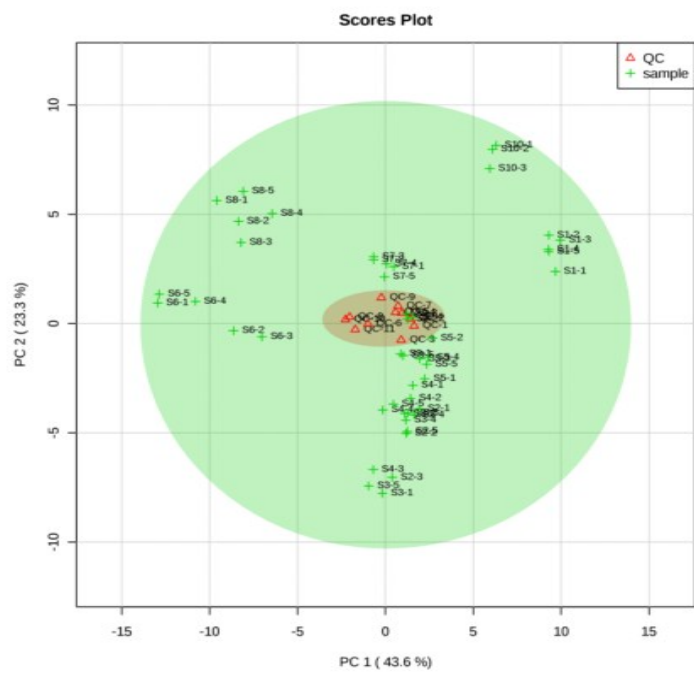

Fig S2 Heatmap visualization of differential metabolites and related pathways. a) M to C, b) YR+M to C, c) APP+M to C, d) LAV+M to C and e) SO+M to C. The color scale (right) illustrates the relative expression level of metabolites across all samples: red color represents an expression level above mean, green color represents expression lower than the mean.

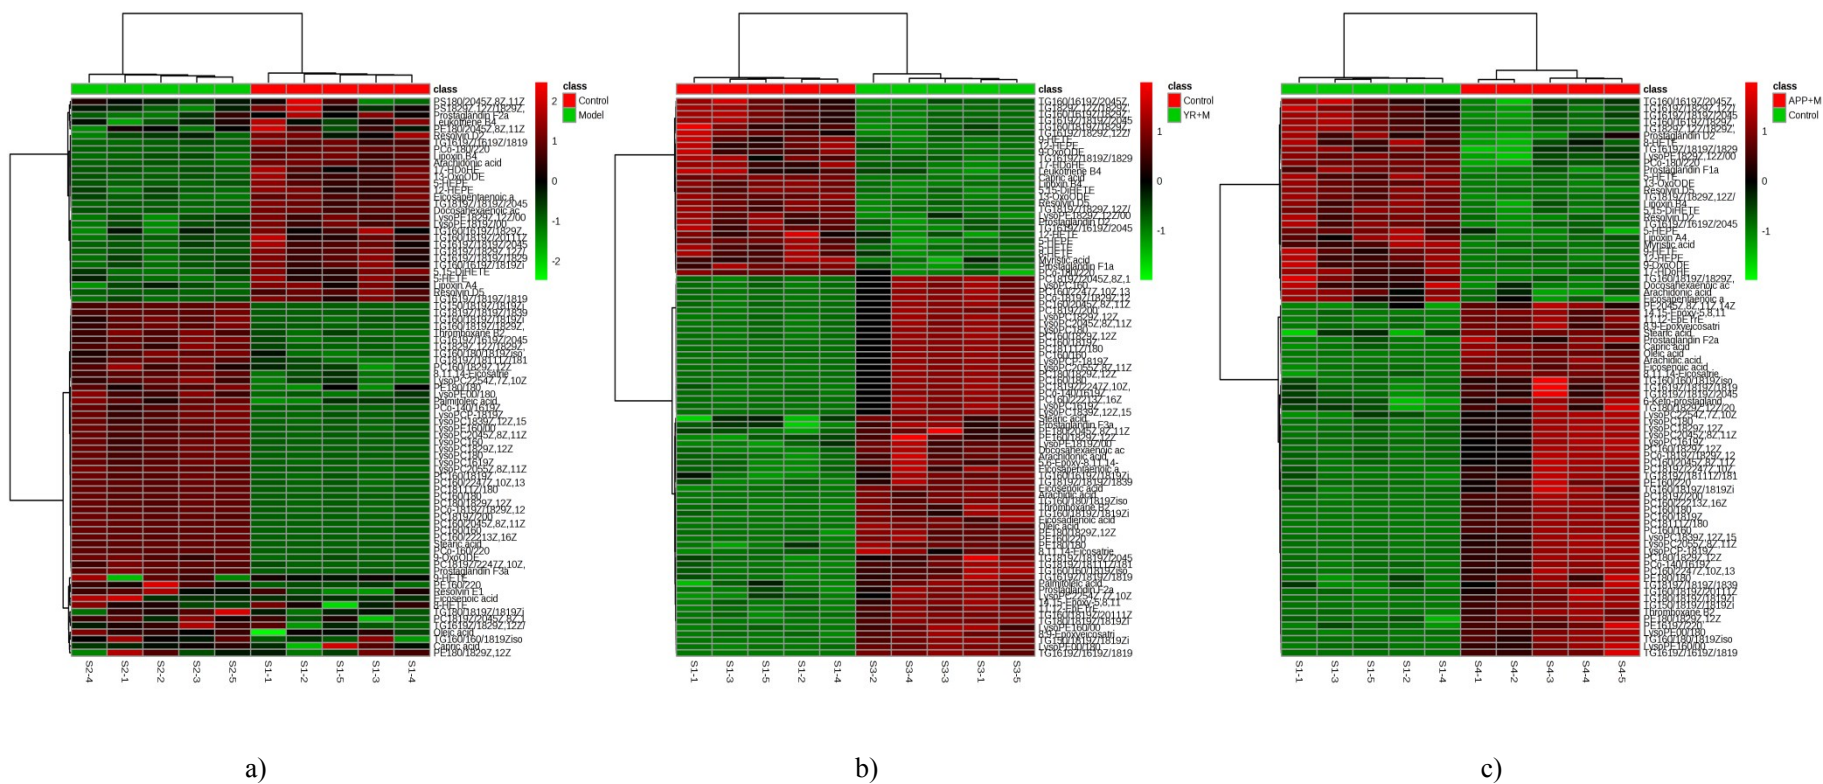



Table S1 The ingredient of each diets

| Ingredient          | D12102C |      | D12108C |      | OD16070802 |      |
|---------------------|---------|------|---------|------|------------|------|
|                     | gm      | kcal | gm      | kcal | gm         | kcal |
| Casein              | 200     | 800  | 200     | 800  | 200        | 800  |
| L-Cystine           | 3       | 12   | 3       | 12   | 3          | 12   |
| Corn Starch         | 375     | 1500 | 212     | 848  | 212        | 848  |
| Maltodextrin 10     | 125     | 500  | 71      | 284  | 71         | 284  |
| Sucrose             | 200     | 800  | 113     | 452  | 113        | 452  |
| Cellulose, BW200    | 50      | 0    | 50      | 0    | 50         | 0    |
| Soybean Oil         | 25      | 225  | 25      | 225  | 25         | 225  |
| Seal oil            | 0       | 0    | 0       | 0    | 36         | 324  |
| Cocoa Butter        | 20      | 180  | 155     | 1395 | 119        | 1071 |
| Mineral Mix S10021  | 10      | 0    | 10      | 0    | 10         | 0    |
| Dicalcium Phosphate | 13      | 0    | 13      | 0    | 13         | 0    |
| Calcium Carbonate   | 5.5     | 0    | 5.5     | 0    | 5.5        | 0    |
| Potassium Citrate   | 16.5    | 0    | 16.5    | 0    | 16.5       | 0    |
| Vitamin Mix V10001  | 10      | 40   | 10      | 40   | 10         | 40   |
| Choline Bitartrate  | 2       | 0    | 2       | 0    | 2          | 0    |
| Cholesterol         | 0       | 0    | 11.25   | 0    | 11.25      | 0    |

Table S2 The composition of each diets

| Diet NO.     | D12102C |       | D12108C |       | OD16070802 |       |
|--------------|---------|-------|---------|-------|------------|-------|
|              | gm%     | kcal% | gm%     | kcal% | gm%        | kcal% |
| Protein      | 19.2    | 20    | 23      | 20    | 23         | 20    |
| Carbohydrate | 67.3    | 70    | 45      | 40    | 45         | 40    |
| Fat          | 4.3     | 10    | 20      | 40    | 20         | 40    |
| Total        |         | 100   |         | 100   |            | 100   |
| kcal/gm      |         | 3.85  |         | 4.5   |            | 4.5   |

Table S3 The optimal parameters of PL

| Classes | Scan mode | Declustering potential (V) | Collision energy (V) |
|---------|-----------|----------------------------|----------------------|
| PC      | +PIS 184  | 166.8                      | 47.7                 |
| PE      | +NLS 141  | 139.9                      | 35.3                 |
| PS      | +NLS 185  | 127.7                      | 38.8                 |
| PG      | +NLS 189  | 64.6                       | 28.5                 |
| PA      | +NLS 115  | 71.3                       | 25.7                 |
| PI      | +NLS 277  | 120.4                      | 32.6                 |

Table S4 The optimal parameters of LM

| Compounds        | Scan mode | Precursor ion (m/z) | Product ion (m/z) | Declustering potential (V) | Collision energy (V) | IS                               | Retention time (min) |
|------------------|-----------|---------------------|-------------------|----------------------------|----------------------|----------------------------------|----------------------|
| AA               | (-)       | 303.2               | 259.3             | -89                        | -20                  | d4-PGE <sub>2</sub>              | 13.70                |
| LXB <sub>4</sub> | (-)       | 351.3               | 221.2             | -70                        | -23                  | d <sub>4</sub> -LTB <sub>4</sub> | 3.12                 |
| 5,15-DIHETE      | (-)       | 335.3               | 115               | -43                        | -20                  | d <sub>8</sub> -5S-HETE          | 5.36                 |
| EPA              | (-)       | 301.3               | 257.3             | -90                        | -19                  | d4-PGE <sub>2</sub>              | 12.30                |
| LXA <sub>5</sub> | (-)       | 349.3               | 215.2             | -48                        | -26                  | d <sub>4</sub> -LTB <sub>4</sub> | 3.08                 |
| 5-HEPE           | (-)       | 317.2               | 115               | -53                        | -20                  | d <sub>8</sub> -5S-HETE          | 8.94                 |
| 12-HEPE          | (-)       | 317.2               | 179.1             | -64                        | -20                  | d <sub>8</sub> -5S-HETE          | 8.73                 |
| 15-HEPE          | (-)       | 317.2               | 219.2             | -63                        | -19                  | d <sub>8</sub> -5S-HETE          | 8.46                 |
| 18-HEPE          | (-)       | 317.2               | 259.2             | -84                        | -18                  | d <sub>8</sub> -5S-HETE          | 8.03                 |
| DHA              | (-)       | 327.3               | 283.3             | -90                        | -17                  | d4-PGE <sub>2</sub>              | 13.20                |
| RvD5             | (-)       | 359.2               | 199.2             | -40                        | -22                  | d5-RVD1                          | 5.38                 |
| 1-Mar            | (-)       | 359.2               | 250.2             | -65                        | -22                  | d <sub>4</sub> -LTB <sub>4</sub> | 5.31                 |
| PDX              | (-)       | 359.2               | 153.1             | -55                        | -24                  | d <sub>4</sub> -LTB <sub>4</sub> | 5.28                 |
| 4-HDHA           | (-)       | 343.2               | 101               | -46                        | -21                  | d <sub>8</sub> -5S-HETE          | 10.30                |
| 7-HDHA           | (-)       | 343.3               | 141               | -50                        | -19                  | d <sub>8</sub> -5S-HETE          | 9.82                 |
| 14-HDHA          | (-)       | 343.3               | 205.2             | -74                        | -18                  | d <sub>8</sub> -5S-HETE          | 9.51                 |
| 17-HDHA          | (-)       | 343.2               | 245.2             | -83                        | -17                  | d <sub>8</sub> -5S-HETE          | 9.32                 |
| 9-HETE           | (-)       | 319.2               | 151               | -70                        | -21                  | d <sub>8</sub> -5S-HETE          | 9.98                 |
| 19-HETE          | (-)       | 319.2               | 231.2             | -91                        | -23                  | d <sub>8</sub> -5S-HETE          | 8.25                 |
| 18-HETE          | (-)       | 319.3               | 261.2             | -61                        | -23                  | d <sub>8</sub> -5S-HETE          | 8.73                 |
| 17-HETE          | (-)       | 319.3               | 247.2             | -84                        | -22                  | d <sub>8</sub> -5S-HETE          | 8.80                 |
| 16-HETE          | (-)       | 319.2               | 189.2             | -72                        | -22                  | d <sub>8</sub> -5S-HETE          | 8.90                 |
| PGJ <sub>2</sub> | (-)       | 333.2               | 189.2             | -36                        | -24                  | d <sub>4</sub> -PGE <sub>2</sub> | 4.57                 |
| PGK <sub>1</sub> | (-)       | 351.3               | 251.2             | -60                        | -27                  | d4-PGE <sub>2</sub>              | 3.19                 |
| PGD <sub>2</sub> | (-)       | 351.3               | 271.2             | -52                        | -24                  | d4-PGE <sub>2</sub>              | 3.38                 |

|                          |     |       |       |      |        |                                  |       |
|--------------------------|-----|-------|-------|------|--------|----------------------------------|-------|
| PGF <sub>2α</sub>        | (-) | 353.2 | 193.1 | -90  | -39    | d4-PGE <sub>2</sub>              | 3.17  |
| 11,12-EET                | (-) | 319.2 | 167.2 | -61  | -19    | d11-11,12-EET                    | 10.90 |
| 5-HETE                   | (-) | 319.3 | 115   | -58  | -21    | d <sub>8</sub> -5S-HETE          | 10.20 |
| LTB <sub>4</sub>         | (-) | 335.3 | 195.2 | -70  | -22    | d <sub>4</sub> -LTB <sub>4</sub> | 5.67  |
| 15-HETE                  | (-) | 319.3 | 219.2 | -73  | -18    | d <sub>8</sub> -5S-HETE          | 9.36  |
| PGE <sub>2</sub>         | (-) | 351.3 | 271.2 | -56  | -24    | d4-PGE <sub>2</sub>              | 3.22  |
| PGF <sub>1α</sub>        | (-) | 355.2 | 293.3 | -95  | -33    | d4-PGE <sub>2</sub>              | 2.99  |
| 6-Keto-PGF <sub>1α</sub> | (-) | 369.3 | 163.1 | -110 | -42    | d4-PGE <sub>2</sub>              | 2.70  |
| 8-HETE                   | (-) | 319.3 | 155   | -66  | -20    | d <sub>8</sub> -5S-HETE          | 9.84  |
| 11-HETE                  | (-) | 319.2 | 167.1 | -68  | -22    | d <sub>8</sub> -5S-HETE          | 9.62  |
| 12-HETE                  | (-) | 319.2 | 179   | -84  | -20    | d <sub>8</sub> -5S-HETE          | 9.83  |
| 20-HETE                  | (-) | 319.3 | 289.3 | -78  | -25    | d <sub>8</sub> -5S-HETE          | 8.36  |
| 5,6-EET                  | (-) | 319.2 | 191.2 | -85  | -16    | d11-11,12-EET                    | 11.20 |
| 8,9-EET                  | (-) | 319.2 | 155   | -66  | -17    | d11-11,12-EET                    | 11.00 |
| 14,15-EET                | (-) | 319.2 | 219   | -64  | -16    | d11-11,12-EET                    | 10.50 |
| PGF <sub>3α</sub>        | (-) | 351.2 | 307.2 | -63  | -26    | d4-PGE <sub>2</sub>              | 2.88  |
| TXB <sub>2</sub>         | (-) | 369.3 | 169.1 | -68  | -24    | d4-PGE <sub>2</sub>              | 2.94  |
| TXB <sub>3</sub>         | (-) | 367.3 | 169.1 | -62  | -23    | d4-PGE <sub>2</sub>              | 2.73  |
| LXA <sub>4</sub>         | (-) | 351.2 | 115   | -63  | -21    | d <sub>4</sub> -LTB <sub>4</sub> | 3.52  |
| RVE1                     | (-) | 349.2 | 195.1 | -78  | -23    | d <sub>4</sub> -LTB <sub>4</sub> | 2.57  |
| RVD1                     | (-) | 375   | 141   | -45  | -20    | d5-RVD1                          | 3.44  |
| RVD2                     | (-) | 375.2 | 141.2 | -80  | -23    | d5-RVD1                          | 3.10  |
| RVD3                     | (-) | 375.2 | 147.1 | -80  | -28    | d5-RVD1                          | 3.07  |
| 5s,6r-DIHETE             | (-) | 335.3 | 114.9 | -71  | -22    | d <sub>8</sub> -5S-HETE          | 7.96  |
| 5s,6s-DIHETE             | (-) | 335   | 115   | -50  | -29    | d <sub>8</sub> -5S-HETE          | 8.22  |
| 13-oxoODE                | (-) | 293   | 113   | -70  | -30    | d4-9s-HODE                       | 9.48  |
| 9-oxoODE                 | (-) | 293.2 | 185.2 | -68  | -29.24 | d4-9s-HODE                       | 9.74  |

Table S5 The quantitative result of free fatty acids (FFA) in each groups (n=5, Concentration: nmol/L)

| Metabolites | C              | M              | YR+M           | APP+M          | LAV+M          | SO+M           |
|-------------|----------------|----------------|----------------|----------------|----------------|----------------|
| C10:0       | 404.3±16.9     | nd             | nd             | 610.5±36.4     | 543.1±70       | 219.4±24.2     |
| C12:0       | 1413.3±271.5   | 1376.9±72.2    | 1165±57.4      | 1154±220.6     | 1411.6±56.1    | 919.9±175.1    |
| C14:0       | 15430.3±975.3  | 13434.2±484.7  | 12188.9±823.2  | 11766.1±237.5  | 10467±530.2    | 7280.9±871.4   |
| C16:0       | 35653.1±2286.4 | 35012.1±915.4  | 33123.7±5325.6 | 34904.9±2403.7 | 36786.2±3328.3 | 13718.5±1695.7 |
| C16:1       | 10133.6±1635.6 | 18116.3±1505.1 | 16447±1038.9   | 9829.2±622.6   | 9715.8±835.6   | 1849.9±419.9   |
| C18:0       | 9008.1±896.4   | 12375.4±701.9  | 11122.4±355.8  | 11520.4±153.7  | 10859±1159.6   | 6302.9±529.4   |
| C18:1       | 22920±327      | 60517.1±862.8  | 53987.9±3695.3 | 47715.5±2268.8 | 46168±1864     | 11896.5±2255.3 |
| C18:2       | 22984.1±2538.4 | 25399.9±1022   | 19089.6±2317.7 | 18799.7±1718.2 | 15604.5±616.9  | 4966.6±1326.2  |
| C18:3       | 1999.1±619     | 1905.9±57.7    | 1970.8±42.3    | 3079.3±67.5    | 2364.5±74.7    | 236.6±29.1     |
| C20:0       | nd             | 314.1±448.5    | 805.9±93.9     | 820.1±67.7     | 1067.9±42.2    | 81.9±24.8      |
| C20:1       | 542.1±53.3     | 1897.5±57.4    | 1631.3±32.4    | 1690.4±94.9    | 1494.7±12.9    | 230.6±12.6     |
| C20:2       | nd             | 284.1±390.3    | 552.9±83.3     | nd             | nd             | nd             |
| C20:3       | 463.7±41.4     | 1724.7±51.1    | 1021.1±163.1   | 838.7±4.3      | 496±681.1      | 80.5±49.7      |
| C20:4       | 3217±546       | 6693.5±363.7   | 3725.3±8.3     | 1632.5±1499.1  | 1873.5±1729.5  | 422.8±138.3    |
| C20:5       | 444.3±34.3     | 236.8±324.2    | 812.2±125.9    | 395.3±367.4    | 454.8±259.1    | 207.6±86.3     |
| C22:0       | nd             | 180.8±404.3    | nd             | nd             | nd             | nd             |
| C22:1       | nd             | nd             | nd             | 1011.1±932.7   | 288±394.8      | 50.4±49.1      |
| C22:6       | 2250.8±156     | 3767.5±62.5    | 2076.8±276.3   | nd             | 550.6±759.5    | 717.6±170.8    |

"nd" stand for " not detected because concentrations were lower than LOQ"



Table S6 The quantitative result of phospholipid (PL) in each groups (n=5, Concentration: nmol/mL)

| Metabolites     | C          | M           | YR+M         | APP+M        | LAV+M       | SO+M        |
|-----------------|------------|-------------|--------------|--------------|-------------|-------------|
| LPC(16:0)       | 81.1±1.88  | 131.67±7.42 | 108.2±34.84  | 114.99±20.15 | 122.23±2.26 | 113.45±3.48 |
| LPC(16:1)       | 2.04±0.03  | 4.64±0.31   | 3.69±1.24    | 3.82±0.76    | 3.88±0.12   | 3.79±0.15   |
| LPC(18:0)       | 45.01±1.43 | 99.01±4.63  | 85.61±26.02  | 88.26±14.93  | 95.76±1.63  | 91.21±2.22  |
| LPC(18:1)       | 21.2±0.76  | 89.05±5.68  | 75.13±25.68  | 78.51±14.21  | 80.27±0.95  | 77.39±2.22  |
| LPC(18:2)       | 45.52±2.09 | 92.33±6.58  | 81.84±28.1   | 84.63±15.55  | 86.95±1.47  | 89.37±3.14  |
| LPC(18:3)       | 0.65±0.01  | 2.12±0.15   | 1.93±0.64    | 1.9±0.37     | 1.83±0.08   | 1.43±0.06   |
| LPC(20:4)       | 16.71±0.76 | 42.14±3.08  | 31.17±10.39  | 36.31±7.07   | 40.53±1.06  | 17.7±0.6    |
| LPC(20:5)       | 0.32±0.02  | 1.3±0.08    | 1.34±0.45    | 1.14±0.23    | 1.2±0.04    | 6.66±0.27   |
| PC(O-30:1)      | 0.29±0.02  | 0.92±0.05   | 0.77±0.29    | 0.71±0.11    | 0.81±0.06   | 0.79±0.03   |
| LPC(O-16:0)     | 0.61±0.01  | 1.14±0.09   | 0.93±0.35    | 1.01±0.1     | 1.09±0.03   | 0.93±0.04   |
| LPC(O-18:0)     | 1.34±0.03  | 1.7±0.06    | 1.38±0.45    | 1.48±0.26    | 1.64±0.07   | 1.51±0.06   |
| LPC(O-18:1)     | 0.29±0.02  | 0.8±0.06    | 0.61±0.23    | 0.64±0.12    | 0.72±0.02   | 0.6±0.02    |
| PC(O-18:0/14:2) | nd         | 1.1±0.03    | 0.92±0.28    | 0.99±0.16    | 1.02±0.05   | 1.02±0.05   |
| PC(O-16:1/18:0) | 2.97±0.21  | 60.9±1.92   | 50.65±14.25  | 55.42±8.36   | 61.2±1.88   | 52.33±1.63  |
| PC(O-16:1/18:1) | 3.11±0.05  | 15.19±0.33  | 13.33±3.61   | 13.65±2.14   | 14.96±0.42  | 14.56±0.29  |
| PC(18:1/18:0)   | 13.27±0.32 | 103.97±1.33 | 98.61±10.82  | 92.05±13.82  | 97.12±3.4   | 115.25±2.79 |
| PC(18:0/18:2)   | 128.7±3    | 311.44±6.12 | 328.32±11.56 | 288.52±42.81 | 298.51±9.39 | 361.22±5.77 |
| PC(18:1/18:2)   | 47.54±1.05 | 88.08±1.96  | 84.39±3.57   | 74.47±11.73  | 77.28±2.36  | 81.66±1.63  |
| PC(16:0/20:4)   | 114.7±2.75 | 223.49±4.12 | 188.05±11.69 | 186.74±30.13 | 203.13±5.14 | 106.98±1.78 |
| PC(18:1/20:0)   | 0.75±0.06  | 4.01±0.12   | 3.56±0.98    | 3.82±0.58    | 3.82±0.22   | 4.31±0.33   |
| PC(16:0/22:2)   | 2.41±0.1   | 11.45±0.42  | 10.66±2.48   | 11.63±2.02   | 12.6±0.88   | 13.85±0.51  |
| PC(16:0/22:3)   | 9.94±0.21  | 29.58±0.5   | 32.24±6.74   | 26.57±4.22   | 30.23±1.19  | 31.18±0.98  |
| PC(16:0/22:4)   | 56.61±1.21 | 132±2.12    | 116.18±5.34  | 115.49±17.42 | 126.07±3.57 | 62.02±1.28  |
| PC(18:1/20:4)   | 19.66±0.47 | 30.12±0.35  | 27.69±0.99   | 25.66±4.06   | 27.07±0.85  | 35.7±1      |
| PC(16:0/22:6)   | 95.16±2.25 | 97.61±1.54  | 106.57±24.49 | 84.49±13.4   | 84.94±2.68  | 104.75±2.09 |
| PC(18:2/22:1)   | nd         | 0.83±0.04   | 0.76±0.13    | 0.79±0.1     | 0.84±0.05   | 0.75±0.05   |
| PC(18:1/22:4)   | 1.81±0.09  | 3.42±0.18   | 3.01±0.49    | 3.09±0.42    | 3.2±0.08    | 3.19±0.1    |
| PC(O-20:0/20:1) | 2.11±0.05  | 1.81±0.07   | 1.53±0.32    | 1.67±0.22    | 1.79±0.06   | 1.96±0.07   |
| PC(O-20:1/20:1) | 0.29±0.02  | 0.92±0.02   | 0.77±0.2     | 0.85±0.13    | 0.97±0.06   | 1.02±0.04   |
| LPC(22:5)       | 1.13±0.19  | 2.16±0.21   | 2.07±0.63    | 2.24±0.44    | 2.29±0.21   | 2.18±0.39   |
| PC(O-16:0/16:0) | 0.93±0.04  | 15.56±0.51  | 13.12±3.71   | 13.8±2.17    | 16±0.55     | 13.89±0.24  |

|                             |             |              |              |              |              |             |
|-----------------------------|-------------|--------------|--------------|--------------|--------------|-------------|
| PC(O-16:1/16:0)             | 0.55±0.04   | 6.2±0.22     | 5.13±1.46    | 5.53±0.78    | 6.13±0.2     | 6.41±0.16   |
| PC(16:0/16:0)               | 7.44±0.23   | 61±0.61      | 58.02±2.52   | 53.79±8.17   | 56.23±2.18   | 65.72±1.24  |
| PC(16:0/16:1) PC(14:1/18:0) | 3.58±0.11   | 30.9±0.7     | 26.45±3.17   | 25.29±3.97   | 24.6±1.22    | 28.13±0.71  |
| PC(14:0/18:2) PC(14:2/18:0) | 0.89±0.03   | 2.51±0.08    | 2.11±0.58    | 2.08±0.37    | 2.11±0.1     | 2.1±0.03    |
| PC(O-18:0/18:0)             | nd          | 2.54±0.06    | 2.26±0.54    | 2.42±0.35    | 2.83±0.12    | 3.03±0.06   |
| PC(O-18:0/18:2)             | 6.37±0.33   | 17.55±0.45   | 15.44±3.82   | 15.93±2.4    | 17.19±0.53   | 16.34±0.41  |
| PC(O-18:2/18:1)             | 1.69±0.11   | 8.09±0.19    | 7.32±1.93    | 7.19±1.18    | 7.99±0.31    | 7.11±0.19   |
| PC(O-16:0/20:4)             | 3.76±0.16   | 34.55±0.97   | 27.25±7.57   | 30.05±4.94   | 33.83±1.31   | 17.5±0.52   |
| PC(16:0/18:0)               | 1.75±0.07   | 13.87±0.57   | 13.13±0.57   | 12.44±2.07   | 12.79±0.61   | 15.06±0.3   |
| PC(16:0/18:1)               | 78.81±1.94  | 362.52±9.53  | 341.5±13.42  | 325.28±47.03 | 328.31±11.52 | 346.25±7.59 |
| PC(16:0/18:2)               | 293.35±7.11 | 472.89±10.32 | 467.66±17.44 | 439.01±64.07 | 440.92±15.5  | 505.52±8.55 |
| PC(O-16:0/22:0)             | 2.69±0.08   | 2.99±0.08    | 2.77±0.45    | 2.67±0.36    | 2.82±0.12    | 4.05±0.13   |
| PC(O-20:0/18:1)             | 0.71±0.03   | 5.02±0.07    | 4.17±1.18    | 4.7±0.62     | 4.92±0.1     | 5.09±0.11   |
| PC(O-18:0/20:4)             | 3.45±0.18   | 25.65±0.8    | 20.71±5.49   | 22.89±3.63   | 26.38±0.65   | 12.98±0.28  |
| PC(O-16:0/22:6)             | 2.64±0.13   | 11.37±0.25   | 10.32±2.89   | 9.92±1.59    | 11.08±0.32   | 16.21±0.28  |
| PC(O-18:0/22:0)             | 9.2±0.2     | 6.27±0.03    | 6.5±0.49     | 5.24±0.86    | 5.32±0.17    | 6.47±0.26   |
| LPE(16:0)                   | 1.53±0.08   | 3.24±0.24    | 2.97±0.33    | 3.13±0.48    | 3.19±0.26    | 3.53±0.31   |
| LPE(18:0)                   | 1.53±0.12   | 4.78±0.3     | 4.48±0.2     | 4.45±0.62    | 4.73±0.24    | 5.51±0.36   |
| LPE(18:1)                   | 0.79±0.07   | 1.33±0.12    | 1.18±0.08    | 1.11±0.15    | 1.28±0.18    | 1.49±0.35   |
| LPE(18:2)                   | 3.28±0.14   | 2.37±0.18    | 2.39±0.17    | 1.88±0.38    | 1.97±0.07    | 2.22±0.23   |
| LPE(20:3)                   | 0.21±0.04   | 0.27±0.03    | 0.22±0.05    | 0.24±0.06    | 0.24±0.05    | 0.3±0.12    |
| LPE(22:5)                   | 0.26±0.05   | 0.24±0.07    | nd           | nd           | 0.24±0.1     | nd          |
| LPE(O-16:0)                 | 0.36±0.04   | 0.37±0.05    | 0.48±0.04    | 0.47±0.07    | 0.41±0.04    | 0.49±0.07   |
| LPE(O-18:0)                 | nd          | 0.2±0.02     | 0.21±0       | 0.23±0.05    | 0.17±0.04    | 0.28±0.09   |
| LPG(O-16:1)                 | 0.49±0.08   | nd           | 1.16±0.44    | 0.87±0.14    | 1.12±0.17    | 1.75±0.37   |
| LPS(16:0)                   | 3.15±0.27   | 3.79±0.45    | 3.22±0.38    | 3.47±1.5     | 3.88±0.41    | 2.59±0.43   |
| LPS(18:0)                   | 1.17±0.17   | 1.71±0.39    | 1.61±0.48    | 1.38±0.55    | 1.9±0.24     | 1.27±0.23   |
| LPS(18:1)                   | 0.73±0.13   | 2.84±0.27    | 2.12±0.28    | 2.09±0.76    | 2.7±0.36     | 1.99±0.34   |
| LPS(18:2)                   | 1.91±0.14   | 2.72±0.44    | 2.25±0.29    | 2.16±0.85    | 2.54±0.38    | 2.12±0.39   |
| PA(O-16:0/18:2)             | nd          | 4.15±0.73    | 4.78±1.49    | 3.8±1.2      | 7.89±0.69    | 9.17±4.38   |
| PE(O-16:0/16:0)             | nd          | nd           | nd           | 0.23±0.08    | 0.18±0.02    | nd          |
| PE(O-16:0/18:0)             | nd          | 0.65±0.16    | 0.47±0.12    | 0.66±0.08    | 0.63±0.08    | 0.61±0.14   |
| PE(18:0/18:0)               | 0.51±0.13   | 1.28±0.19    | 1.25±0.09    | 1.39±0.26    | 1.13±0.08    | 1.5±0.22    |

|                 |            |           |            |            |            |            |
|-----------------|------------|-----------|------------|------------|------------|------------|
| PE(18:0/18:1)   | 0.2±0.03   | 0.68±0.09 | 0.66±0.12  | 0.61±0.13  | 0.65±0.1   | 0.71±0.12  |
| PE(18:0/18:2)   | 0.86±0.1   | 1.71±0.09 | 2.01±0.14  | 1.46±0.09  | 1.61±0.23  | 1.85±0.14  |
| PE(18:1/18:2)   | 0.34±0.05  | 0.35±0.06 | 0.47±0.08  | 0.4±0.06   | 0.29±0.1   | 0.37±0.05  |
| PE(18:2/18:2)   | 0.9±0.11   | 0.92±0.08 | 1.07±0.2   | 1.14±0.24  | 0.89±0.13  | 0.52±0.05  |
| PE(16:1/20:5)   | nd         | 0.3±0.06  | 0.29±0.05  | 0.27±0.01  | 0.27±0.08  | 0.34±0.07  |
| PE(O-18:1/18:1) | 1.05±0.08  | 5.09±0.3  | 4.83±0.32  | 4.7±0.71   | 4.51±0.27  | 4.54±0.19  |
| PE(16:0/22:0)   | 0.61±0.04  | 2.34±0.23 | 2.44±0.26  | 2.01±0.44  | 1.89±0.22  | 3.1±0.25   |
| PE(16:1/22:0)   | 0.18±0.04  | 0.48±0.14 | 0.43±0.16  | 0.46±0.08  | 0.36±0.07  | 0.67±0.13  |
| PE(O-18:0/20:4) | 2.44±0.14  | 9.6±0.19  | 8.16±0.56  | 9.01±1.36  | 7.85±0.41  | 5.26±0.29  |
| PE(14:1/24:1)   | 0.2±0.03   | 0.31±0.03 | 0.32±0.06  | 0.35±0.14  | 0.28±0.02  | 0.51±0.12  |
| PE(18:0/20:3)   | 0.25±0.05  | 0.37±0.05 | 0.41±0.17  | 0.43±0.1   | 0.39±0.13  | 0.69±0.17  |
| PE(18:0/20:4)   | 1.59±0.14  | 2.19±0.21 | 2.35±0.31  | 2.33±0.35  | 2.1±0.21   | 1.19±0.14  |
| PE(18:1/20:4)   | 0.71±0.16  | 0.57±0.1  | 0.68±0.12  | 0.67±0.1   | 0.56±0.15  | 0.82±0.13  |
| PE(O-20:1/18:1) | 0.63±0.08  | 2.66±0.2  | 2.73±0.28  | 2.51±0.39  | 2.6±0.13   | 2.72±0.16  |
| PE(P-20:0/20:4) | 0.88±0.1   | 3.4±0.4   | 3.41±0.29  | 3.51±0.81  | 3.24±0.29  | 8.08±0.36  |
| PE(20:4/20:4)   | 0.21±0.04  | 0.45±0.09 | 0.47±0.1   | 0.48±0.07  | 0.48±0.02  | 0.52±0.16  |
| PE(O-20:4)      | 3.69±0.28  | 2.66±0.12 | 2.52±0.32  | 2.3±0.31   | 2.52±0.36  | 1.3±0.13   |
| PE(O-20:5)      | 0.21±0.05  | nd        | nd         | nd         | nd         | 0.4±0.08   |
| PE(O-22:6)      | 5.59±0.18  | 2.91±0.32 | 2.54±0.2   | 2.19±0.29  | 2.7±0.22   | 2.48±0.24  |
| PE(O-16:0/18:1) | 0.19±0.04  | 1.6±0.26  | 1.56±0.26  | 1.59±0.24  | 1.51±0.14  | 1.48±0.16  |
| PE(P-16:0/18:1) | 0.21±0.02  | 0.87±0.11 | 0.92±0.19  | 0.89±0.23  | 0.62±0.04  | 0.75±0.14  |
| PE(16:0/18:0)   | nd         | 0.21±0    | nd         | nd         | nd         | nd         |
| PE(16:0/18:1)   | 0.19±0.03  | 0.45±0.13 | 0.56±0.06  | 0.53±0.07  | 0.5±0.08   | 0.51±0.05  |
| PE(16:0/18:2)   | 0.63±0.1   | 0.83±0.06 | 1.13±0.2   | 0.85±0.12  | 0.74±0.06  | 0.84±0.2   |
| PE(O-18:1/20:5) | 2.11±0.18  | 8.69±0.33 | 8.03±0.66  | 7.76±1.15  | 6.14±0.53  | 10.1±0.83  |
| PG(O-14:1/20:1) | nd         | 1.69±0.14 | nd         | nd         | nd         | 2.11±1.11  |
| PG(20:4/22:0)   | nd         | nd        | 1.52±0.4   | 1.68±0.57  | nd         | 2.71±0.96  |
| PS(18:0/18:0)   | 0.79±0.41  | 1.91±0.36 | 2.16±0.53  | 2.48±0.7   | 2.35±0.49  | 1.44±0.16  |
| PS(18:0/18:1)   | 0.63±0.2   | 0.86±0.13 | 0.78±0.14  | 0.98±0.39  | 1.01±0.19  | 1.04±0.2   |
| PS(18:1/18:1)   | 0.61±0.06  | 0.94±0.21 | 0.86±0.01  | 0.85±0.2   | 0.77±0.11  | 0.75±0.13  |
| PS(18:0/18:3)   | nd         | 0.84±0.21 | 0.74±0.3   | 0.94±0.32  | 1.21±0.22  | 1.05±0.07  |
| PS(18:2/18:2)   | 10.31±3.62 | 19.7±2.32 | 17.53±1.31 | 18.83±3.51 | 22.01±4.94 | 24.01±1.78 |
| PS(14:1/22:5)   | 2.82±0.9   | 1.67±0.44 | 1.36±0.17  | 1.49±0.38  | 1.77±0.74  | 1.6±0.38   |

|                 |            |            |            |            |            |           |
|-----------------|------------|------------|------------|------------|------------|-----------|
| PS(16:0/22:0)   | 0.69±0.15  | 1.35±0.36  | 1.51±0.18  | 2.01±0.62  | 1.56±0.55  | 1.08±0.32 |
| PS(18:0/20:4)   | 2.05±0.45  | 5.19±0.85  | 4.57±1.09  | 4.51±1.16  | 6.24±2.89  | 7.08±0.96 |
| PS(18:1/20:4)   | 22.19±9.04 | 20.03±2.11 | 19.47±1.63 | 19.43±3.98 | 23.19±6.55 | 27.8±2.66 |
| PS(18:0/22:0)   | nd         | nd         | 0.77±0.2   | 0.7±0.13   | 0.83±0.04  | nd        |
| PS(18:1/22:0)   | nd         | nd         | 0.81±0.04  | 0.85±0.34  | 0.91±0.23  | 0.83±0.22 |
| PS(18:0/22:6)   | 2.36±0.9   | 2.15±0.77  | 2.05±0.39  | 2.03±0.73  | 2.59±0.48  | 2.31±0.2  |
| PS(20:4/20:4)   | 4.49±1.19  | 2.34±0.57  | 2.33±0.5   | 2.24±0.55  | 3.16±0.91  | 4.17±0.88 |
| PS(10:0/18:0)   | 0.69±0.1   | 0.74±0.1   | 0.78±0.08  | 0.94±0.38  | 0.88±0.2   | 0.67±0.21 |
| PS(16:0/18:1)   | nd         | 0.92±0.18  | 0.77±0.07  | 0.73±0.24  | 0.9±0.17   | 0.72±0.11 |
| PS(16:0/18:2)   | 0.81±0.16  | 0.72±0.12  | 0.97±0.15  | 0.82±0.27  | 0.81±0.19  | nd        |
| PS(O-20:0/18:0) | 26.7±9.81  | 18.51±2.46 | 14.26±1.49 | 16.56±3.23 | 21.27±5.53 | 11.11±1.3 |

"nd" stand for " not detected because concentrations were lower than LOQ"

Table S7 The quantitative result of lipid mediators (LM) in each groups (n=5, Concentration: nmol/L)

| Metabolites       | C           | M           | YR+M          | APP+M         | LAV+M        | SO+M        |
|-------------------|-------------|-------------|---------------|---------------|--------------|-------------|
| AA                | 1986±257.35 | 1046±137.77 | 4943.6±728.68 | 1154.4±203.97 | 1962±246.52  | 2200±281.78 |
| LXB <sub>4</sub>  | 12.02±0.94  | 3±0.37      | 3.12±0.44     | 5.86±0.93     | 2.44±0.34    | 1.78±0.33   |
| 5,15-DIHETE       | 3.96±0.28   | 1.49±0.23   | 0.9±0.25      | 1.39±0.25     | 1.86±0.28    | 0.43±0.07   |
| EPA               | 496.6±62.97 | 271±37.37   | 1091.8±176.2  | 322.2±54.01   | 487.8±41.55  | 4024±499.58 |
| LXA <sub>5</sub>  | 3.22±0.24   | 1.66±0.19   | 0.99±0.2      | 1.68±0.35     | 0.89±0.27    | 1.55±0.26   |
| 12-HEPE           | 1726±110.82 | 1168±110.71 | 961.8±147.39  | 1081.8±151.03 | 1152±170.21  | 4830±573.8  |
| 5-HEPE            | 8.67±1.58   | 1.39±0.28   | 3.54±0.54     | 2.48±0.31     | 2.74±0.13    | 24.56±3.42  |
| 15-HEPE           | 12.03±1.87  | 5.2±0.88    | 6.6±1         | 6.04±0.41     | 7.73±0.93    | 54.52±4.69  |
| 18-HEPE           | 12.06±2.11  | 1.93±0.23   | 3.65±0.38     | 3.4±0.86      | 3.68±0.19    | 40.18±2.85  |
| DHA               | 1266±238.18 | 749.4±94.9  | 4162±457.68   | 691.6±113.79  | 1460±241.87  | 4360±601.12 |
| RvD5              | 2.05±0.16   | 0.53±0.1    | 0.6±0.09      | 0.33±0.07     | 0.45±0.13    | 0.51±0.15   |
| 1-Mar             | 4.9±0.66    | 0.46±0.09   | 0.55±0.1      | 0.48±0.09     | 0.45±0.08    | 1.55±0.26   |
| PD1               | 2.84±0.35   | 0.81±0.08   | 0.56±0.08     | 0.45±0.11     | 0.84±0.13    | 1.39±0.33   |
| 4-HDHA            | 40.92±5.76  | 7.64±0.45   | 10.6±1.44     | 7.62±0.91     | 9.97±1.51    | 47.48±5.92  |
| 7-HDHA            | 16.28±2.32  | 1.21±0.1    | 2.58±0.44     | 2.86±0.44     | 2.94±0.55    | 12.2±1.57   |
| 14-HDHA           | 2008±84.68  | 1784±189.42 | 1882±265.93   | 1796±240.27   | 2352±280.12  | 3265±324.6  |
| 17-HDHA           | 352.6±47.44 | 225.4±31.57 | 162.6±15.04   | 158.8±15.99   | 183.8±19.59  | 354.8±21.53 |
| 9-HETE            | 65.52±10.41 | 35.22±1.43  | 27.85±2.62    | 26.33±2.28    | 33.6±1.71    | 18.78±2.34  |
| 19-HETE           | 11.28±0.16  | 11.29±1.43  | 8.58±1.49     | 11.53±1.43    | 11.1±0.97    | 5.79±0.39   |
| 18-HETE           | 8.27±0.55   | 5.54±0.47   | 5.15±0.7      | 5.32±0.79     | 5.33±0.46    | 2.27±0.33   |
| 17-HETE           | 1.78±0.06   | 1.66±0.14   | 1.15±0.13     | 1.2±0.14      | 1.36±0.23    | 0.94±0.18   |
| 16-HETE           | 4.47±0.34   | 4.09±0.59   | 4.9±0.68      | 3.22±0.7      | 2.56±0.41    | 1.54±0.25   |
| PGJ <sub>2</sub>  | 0.33±0.08   | 0.37±0.08   | 0.37±0.06     | 0.4±0.11      | 0.55±0.11    | 0.42±0.04   |
| PGK <sub>1</sub>  | 2.16±0.25   | 0.61±0.15   | 0.88±0.17     | 1.17±0.22     | 1.06±0.09    | 1.08±0.29   |
| PGD <sub>2</sub>  | 6.8±0.46    | 6.52±0.75   | 4.84±0.24     | 5.13±0.67     | 6.34±0.63    | 4.1±0.74    |
| PGF <sub>2α</sub> | 1.38±0.07   | 1.93±0.13   | 1.93±0.13     | 2.09±0.2      | 2.54±0.35    | 1.61±0.25   |
| 11,12-EET         | 233.2±26.29 | 192.4±22.2  | 713.6±54.84   | 796.2±85.83   | 297.8±56.41  | 236.4±31.14 |
| 5-HETE            | 82.4±12.27  | 23.11±3.05  | 22.64±3.04    | 26.58±1.84    | 26.95±2.95   | 20.97±3.15  |
| LTB <sub>4</sub>  | 1.66±0.28   | 0.76±0.17   | 0.94±0.13     | 1.25±0.17     | 1.15±0.16    | 0.79±0.11   |
| 15-HETE           | 160.4±23.95 | 136.4±17.17 | 76.06±6.15    | 98±9.28       | 110.24±14.29 | 85.2±7.55   |
| PGE <sub>2</sub>  | 4.9±0.49    | 5.09±0.31   | 4.13±0.37     | 4.16±0.59     | 4.35±0.18    | 4.55±0.48   |

|                          |             |              |               |              |               |              |
|--------------------------|-------------|--------------|---------------|--------------|---------------|--------------|
| PGF <sub>1α</sub>        | 3.54±0.31   | 4.15±0.52    | 1.88±0.27     | 1.33±0.22    | 1.47±0.11     | 2.03±0.27    |
| 6-Keto-PGF <sub>1α</sub> | 0.43±0.14   | 0.54±0.06    | 0.74±0.07     | 0.95±0.14    | 1.05±0.12     | 0.87±0.24    |
| 8-HETE                   | 59.21±6.58  | 40.76±4.99   | 31.37±4.44    | 37.54±6.54   | 57.35±5.6     | 42.57±6.2    |
| 11-HETE                  | 41.28±6.65  | 42.58±4.39   | 50.38±5.2     | 59.78±7.91   | 77.86±8.98    | 44.52±0.77   |
| 12-HETE                  | 9562±1272.6 | 9876±561.36  | 6210±843.71   | 11400±758.29 | 11008±1599.97 | 6652±1108.27 |
| 20-HETE                  | 9.44±0.88   | 12.1±1.64    | 9.97±1.23     | 10.64±0.94   | 13.34±1.51    | 8.29±0.3     |
| 5,6-EET                  | 5848±748.18 | 5596±1013.18 | 14640±1722.79 | 4632±560.95  | 2144±242.24   | 7078±1314.96 |
| 8,9-EET                  | 286.6±26.67 | 390.2±60.78  | 775.2±57.54   | 766.2±90.06  | 329.6±45.2    | 266.8±28.73  |
| 14,15-EET                | 337.4±38.93 | 388±60.25    | 952±113.23    | 1132.6±86.71 | 402.4±61.33   | 357.8±47.04  |
| PGF <sub>3α</sub>        | 1.66±0.23   | 5.27±0.69    | 2.43±0.2      | 1.04±0.36    | 0.58±0.12     | 2.51±0.43    |
| TXB <sub>2</sub>         | 125.4±8.35  | 394.2±22.93  | 260.4±24.64   | 298.6±30.81  | 287±9.87      | 233.2±19.9   |
| TXB <sub>3</sub>         | 3.94±0.37   | 7.06±0.53    | 6.3±0.66      | 6.05±0.49    | 6.07±0.68     | 30.88±4.46   |
| LXA <sub>4</sub>         | 2.39±0.59   | 0.58±0.21    | 2.27±0.52     | 0.5±0.19     | 0.58±0.24     | 1.17±0.49    |
| RVE1                     | 8.37±0.85   | 5.97±0.64    | 6.43±0.83     | 5.81±1.12    | 5.27±0.51     | 2.9±0.51     |
| RVD1                     | 0.85±0.18   | 1.07±0.14    | 0.9±0.21      | 0.48±0.08    | 0.53±0.18     | 0.69±0.14    |
| RVD2                     | 5.17±0.61   | 1.33±0.19    | 4.07±0.49     | 1.84±0.3     | 5.51±1.1      | 3.94±0.61    |
| RVD3                     | 0.57±0.18   | 0.23±0.08    | 0.31±0.07     | 0.12±0.01    | 0.33±0.15     | nd           |
| 5s,6r-DIHETE             | 0.17±0.04   | 0.14±0.03    | 0.08±0.02     | 0.15±0.08    | 0.18±0.02     | 0.09±0.05    |
| 5s,6s-DIHETE             | 1.14±0.13   | 1.36±0.17    | 0.4±0.11      | 0.34±0.06    | 0.38±0.03     | 0.3±0.08     |
| 13-oxoODE                | 89.5±7.41   | 14.94±2.45   | 27.62±2.3     | 31.58±3.81   | 52.44±6.26    | 82.38±6.31   |
| 9-oxoODE                 | 82.84±18.28 | 13.86±2.95   | 17.14±1.59    | 14.1±1.29    | 13.9±2.16     | 24.4±3.87    |

"nd" stand for " not detected because concentrations were lower than LOQ"

Table S8 The quantitative result of triacylglycerol (TAG) in each groups (n=5, Concentration: nmol/mL)

| Metabolites | C         | M        | YR+M     | APP+M    | LAV+M    | SO+M     |
|-------------|-----------|----------|----------|----------|----------|----------|
| ArPoPo      | 0.6±0.1   | 0.2±0    | 0.3±0    | 0.2±0    | 0.2±0    | 0.2±0    |
| DhPPo       | 2.2±0.5   | 1±0.2    | 1.2±0.3  | 0.8±0.2  | 0.8±0.2  | 1.6±0.4  |
| ArLPo       | 3.1±0.6   | 1.1±0.2  | 1.1±0.3  | 1±0.3    | 0.9±0.2  | 0.5±0.1  |
| EpOPo+EpLP  | 5.5±0.9   | 1.4±0.3  | 1.9±0.5  | 1.3±0.4  | 1.1±0.3  | 8±1.3    |
| LnPPo+LnMO  | 0.5±0.1   | 0.2±0.1  | 0.3±0.1  | 0.2±0.1  | 0.2±0    | 0.1±0    |
| LPoPo+LLM   | 0.3±0.1   | 0.3±0.1  | 0.4±0.1  | 0.3±0.1  | 0.2±0    | 0.2±0    |
| ArPPo       | 0.8±0.1   | 0.5±0.1  | 0.4±0.1  | 0.4±0.1  | 0.4±0.1  | 0.2±0    |
| PaPO        | 0.6±0.1   | 0.7±0.1  | 0.9±0.1  | 0.6±0.2  | 0.5±0.1  | 0.4±0.1  |
| LnPoO+PLLn  | 7.6±1.6   | 2.1±0.4  | 2.5±0.4  | 1.9±0.5  | 1.4±0.3  | 0.9±0.1  |
| DpPPo       | 0.5±0.1   | 0.3±0.1  | 0.3±0    | 0.2±0    | 0.2±0    | 0.2±0    |
| EpPO        | 2.4±0.4   | 2±0.4    | 2.7±0.3  | 2.1±0.5  | 1.5±0.2  | 13.1±2.4 |
| ArPoO       | 12.2±1.8  | 5.4±1    | 5.2±0.5  | 5.2±1.2  | 4.2±0.5  | 2.4±0.4  |
| LLL         | 5.1±0.9   | 0.8±0.2  | 0.9±0.1  | 0.8±0.2  | 0.7±0.2  | 0.4±0.1  |
| MOL         | 0.9±0.1   | 0.4±0.1  | 0.5±0.1  | 0.4±0.1  | 0.3±0.1  | 0.2±0    |
| MoOO        | 0.1±0     | 0.4±0    | 0.6±0    | 0.4±0.1  | 0.3±0    | 0.2±0    |
| PPoL        | 8.2±1.4   | 2.6±0.5  | 3±0.4    | 2.3±0.5  | 1.8±0.4  | 1.3±0.2  |
| PoPoO       | 0±0       | 0.5±0.1  | 0.6±0    | 0.5±0.1  | 0.4±0    | 0.2±0    |
| PoOL        | 6.4±0.4   | 4.4±0.2  | 5.3±0.1  | 4.3±0.7  | 3.2±0.3  | 2.2±0.3  |
| LnPO        | 35.9±3.5  | 6.9±0.7  | 8.5±0.3  | 7±1.2    | 5.5±0.5  | 4±0.6    |
| LLO         | 21±1.9    | 7±0.4    | 8.5±0.6  | 6.9±0.8  | 6.1±1.3  | 4.3±0.6  |
| LnOO        | 2±0.2     | 3.2±0.2  | 3.9±0.4  | 3.1±0.4  | 2.4±0.3  | 1.6±0.2  |
| DpPO        | 2.8±0.4   | 4.1±0.5  | 3.3±0.5  | 3.5±0.7  | 2.9±0.5  | 3.3±0.5  |
| EtOL        | 1.3±0.2   | 2.4±0.4  | 1.9±0.4  | 2.1±0.5  | 1.8±0.3  | 0.6±0    |
| ArOO        | 6.9±1.3   | 20.7±2.7 | 16.7±3.8 | 16.7±3.8 | 12.1±2.4 | 5.2±0.3  |
| MOO         | 0.9±0.2   | 2.6±0.8  | 2.2±0.3  | 2.3±0.4  | 1.6±0.3  | 0.8±0.1  |
| PPoO        | 3.9±0.6   | 6.3±0.5  | 6.3±0.6  | 5.4±0.7  | 4.1±0.5  | 3.2±0.4  |
| PLO         | 76.1±15.2 | 38.3±4.8 | 36.5±5.3 | 26.8±4.2 | 19.3±3   | 14.5±2.1 |
| PoOO        | 4.8±1.1   | 16.8±2   | 15.5±2.8 | 11.6±2.8 | 7.5±1.6  | 4±0.3    |
| OOL         | 21±4.9    | 27.4±4   | 30.6±5.5 | 23.5±5.6 | 18.2±4.4 | 9.1±0.5  |
| PEtO        | 1.1±0.3   | 4.7±1    | 4.3±0.8  | 4.1±1.6  | 4.2±0.8  | 1.4±0.1  |
| LLS         | 3.3±0.6   | 2.7±0.5  | 3.4±0.7  | 2.6±0.6  | 1.5±0.5  | 1.6±0.2  |

|         |          |           |           |          |          |          |
|---------|----------|-----------|-----------|----------|----------|----------|
| MSO     | 0.1±0    | 0.1±0     | 0.2±0.1   | 0.1±0    | 0.1±0    | 0.2±0    |
| PPO     | 5±1      | 14±2      | 18.5±3.5  | 15.1±4   | 8.7±1.6  | 8.1±0.4  |
| POO     | 20.9±3.1 | 65.6±10.7 | 74.2±13.2 | 59.5±14  | 51.8±5   | 38.2±4.5 |
| OOO     | 7.5±2.9  | 42.9±6    | 43.9±6.7  | 35.5±9   | 32.3±5.4 | 17.8±4.1 |
| EdPO    | 1.7±0.3  | 1.4±0.2   | 1.2±0.2   | 1.2±0.3  | 1.1±0.1  | 1.1±0.1  |
| POS     | 1.5±0.3  | 16.9±0.5  | 20.5±1.5  | 19.7±4.1 | 10.4±2   | 23.3±4   |
| GPP     | 0.4±0.1  | 0.4±0     | 0.3±0     | 0.3±0.1  | 0.4±0.1  | 0.5±0.1  |
| GPO     | 0.9±0.1  | 2.7±0.4   | 2.4±0.2   | 2.7±0.5  | 2.5±0.4  | 3.5±1.1  |
| SOO     | 2.2±0.5  | 20.2±2.6  | 24.9±2.1  | 25.8±5.4 | 14.8±2   | 32.7±9.6 |
| OOG+OLA | 0.6±0.2  | 3.8±0.8   | 4.9±1.5   | 6.3±2    | 6±1.1    | 5.3±0.7  |
| SLG     | 0.3±0.1  | 0.5±0.2   | 0.6±0.1   | 0.5±0.1  | 0.5±0    | 0.8±0.2  |
| DhHP    | 0.3±0.1  | 11.2±1.7  | 8.1±1.1   | 8.5±2.2  | 9.1±1.7  | 18.7±2.1 |
| DhHO    | 0.1±0    | 4.2±0.3   | 3.5±0.2   | 3.6±0.9  | 3.1±0.6  | 9±2.2    |
| DhSH    | 0.1±0    | 4±0.7     | 3.8±1.2   | 5.7±2    | 7.9±1.8  | 19.2±3   |
| PdOO    | 0±0      | 3±0.2     | 2.5±0.3   | 2.8±0.5  | 2.7±0.3  | 4±0.9    |

"nd" stand for " not detected because concentrations were lower than LOQ"



Table S9 The potential active metabolites between model group (M) and control group (C) (VIP&gt;1, p&lt;0.05)

| Metabolites                          | VIP  | Fold change | P value | Regulation (up or down) |
|--------------------------------------|------|-------------|---------|-------------------------|
| <b>M vs. C</b>                       |      |             |         |                         |
| PC(16:0/16:0)                        | 1.19 | 8.63        | ***     | ↑                       |
| PC(18:1(11Z)/18:0)                   | 1.19 | 2.42        | ***     | ↑                       |
| Oleic acid                           | 1.19 | 1.11        | ***     | ↑                       |
| PC(16:0/22:4(7Z,10Z,13Z,16Z))        | 1.19 | 1.53        | ***     | ↑                       |
| TG(16:0/18:0/18:1(9Z))[iso6]         | 1.19 | 1.60        | ***     | ↑                       |
| PC(16:0/18:1(9Z))                    | 1.19 | 1.61        | ***     | ↑                       |
| PC(18:0/18:2(9Z,12Z))                | 1.18 | 1.85        | ***     | ↑                       |
| Capric acid                          | 1.18 | 0.97        | ***     | ↓                       |
| PC(18:1(9Z)/20:0)                    | 1.18 | 4.76        | ***     | ↑                       |
| PC(16:0/20:4(5Z,8Z,11Z,14Z))         | 1.18 | 5.33        | ***     | ↑                       |
| PC(16:0/22:2(13Z,16Z))               | 1.18 | 2.98        | ***     | ↑                       |
| PC(16:0/18:0)                        | 1.18 | 4.60        | ***     | ↑                       |
| 8,11,14-Eicosatrienoic acid          | 1.18 | 2.08        | ***     | ↑                       |
| PC(o-18:1(9Z)/18:2(9Z,12Z))          | 1.18 | 1.95        | ***     | ↑                       |
| PC(18:1(9Z)/20:4(5Z,8Z,11Z,14Z))     | 1.18 | 1.03        | ***     | ↑                       |
| Eicosenoic acid                      | 1.18 | /           | ***     | ↑                       |
| PC(o-18:0/22:0)                      | 1.18 | /           | ***     | ↓                       |
| PC(16:0/18:2(9Z,12Z))                | 1.18 | 1.11        | ***     | ↑                       |
| LysoPC(20:5(5Z,8Z,11Z,14Z,17Z))      | 1.18 | 3.20        | ***     | ↑                       |
| TG(15:0/18:1(9Z)/18:1(9Z))[iso3]     | 1.18 | 67.85       | ***     | ↑                       |
| LysoPC(P-18:1(9Z))                   | 1.18 | 2.03        | ***     | ↑                       |
| PC(o-14:0/16:1(9Z))                  | 1.18 | 1.86        | ***     | ↑                       |
| Thromboxane B2                       | 1.18 | 1.79        | ***     | ↑                       |
| LysoPC(18:0)                         | 1.18 | 4.20        | ***     | ↑                       |
| LysoPE(0:0/18:0)                     | 1.18 | 1.69        | ***     | ↑                       |
| LysoPC(18:3(9Z,12Z,15Z))             | 1.18 | 2.52        | ***     | ↑                       |
| 13-OxoODE                            | 1.18 | 0.17        | ***     | ↓                       |
| Lipoxin B4                           | 1.17 | 0.38        | ***     | ↓                       |
| TG(16:1(9Z)/16:1(9Z)/18:1(9Z))[iso3] | 1.17 | 0.29        | ***     | ↓                       |
| LysoPC(16:1(9Z))                     | 1.17 | 2.20        | ***     | ↑                       |

|                                                 |      |       |     |   |
|-------------------------------------------------|------|-------|-----|---|
| PC(18:1(9Z)/22:4(7Z,10Z,13Z,16Z))               | 1.17 | 1.89  | *** | ↑ |
| Resolvin D5                                     | 1.17 | 0.09  | *** | ↓ |
| LysoPC(20:4(5Z,8Z,11Z,14Z))                     | 1.17 | 4.06  | *** | ↑ |
| PE(16:0/22:0)                                   | 1.17 | 2.58  | *** | ↑ |
| TG(18:1(9Z)/18:2(9Z,12Z)/18:2(9Z,12Z))[iso3]    | 1.17 | 0.16  | *** | ↓ |
| TG(18:0/18:1(9Z)/18:1(9Z))[iso3]                | 1.17 | 1.56  | *** | ↑ |
| 5,15-DiHETE                                     | 1.17 | 0.55  | *** | ↓ |
| LysoPC(18:2(9Z,12Z))                            | 1.17 | 3.27  | *** | ↑ |
| LysoPE(16:0/0:0)                                | 1.17 | 3.12  | *** | ↑ |
| LysoPC(16:0)                                    | 1.16 | 2.27  | *** | ↑ |
| PE(18:0/18:2(9Z,12Z))                           | 1.16 | 1.02  | *** | ↑ |
| Resolvin D2                                     | 1.16 | 0.40  | *** | ↓ |
| TG(16:1(9Z)/18:1(9Z)/18:1(9Z))[iso3]            | 1.15 | 0.68  | *** | ↓ |
| TG(18:1(9Z)/18:1(11Z)/18:1(9Z))[iso3]           | 1.15 | 1.65  | *** | ↑ |
| TG(16:1(9Z)/16:1(9Z)/20:4(5Z,8Z,11Z,14Z))[iso3] | 1.15 | 3.48  | *** | ↑ |
| Prostaglandin F3a                               | 1.15 | 3.14  | *** | ↑ |
| TG(16:0/18:1(9Z)/20:1(11Z))[iso6]               | 1.15 | 0.50  | *** | ↓ |
| 5-HETE                                          | 1.15 | 0.46  | *** | ↓ |
| TG(18:1(9Z)/18:1(9Z)/20:4(5Z,8Z,11Z,14Z))[iso3] | 1.14 | 0.33  | *** | ↓ |
| 12-HEPE                                         | 1.14 | 0.43  | *** | ↓ |
| TG(18:2(9Z,12Z)/18:2(9Z,12Z)/18:2(9Z,12Z))      | 1.14 | 5.75  | *** | ↑ |
| TG(16:1(9Z)/18:1(9Z)/18:2(9Z,12Z))[iso6]        | 1.14 | 0.44  | *** | ↓ |
| TG(18:1(9Z)/18:1(9Z)/18:3(9Z,12Z,15Z))[iso3]    | 1.14 | 67.85 | *** | ↑ |
| LysoPE(18:2(9Z,12Z)/0:0)                        | 1.13 | 0.72  | *** | ↓ |
| TG(16:0/18:1(9Z)/18:1(9Z))[iso3]                | 1.13 | 2.90  | *** | ↑ |
| TG(16:0/16:0/18:1(9Z))[iso3]                    | 1.13 | 1.16  | *** | ↑ |
| LysoPE(18:1(9Z)/0:0)                            | 1.13 | 0.72  | *** | ↓ |
| 9-OxoODE                                        | 1.12 | 2.11  | *** | ↑ |
| Prostaglandin F2a                               | 1.12 | 0.83  | *** | ↓ |
| LysoPC(22:5(4Z,7Z,10Z,13Z,16Z))                 | 1.12 | 1.90  | *** | ↑ |
| Palmitoleic acid                                | 1.12 | 1.37  | *** | ↑ |
| TG(16:0/16:1(9Z)/18:2(9Z,12Z))[iso6]            | 1.12 | 0.67  | *** | ↓ |
| 5-HEPE                                          | 1.12 | 0.16  | *** | ↓ |

|                                                     |      |      |     |   |
|-----------------------------------------------------|------|------|-----|---|
| PE(18:0/18:0)                                       | 1.11 | 3.46 | *** | ↑ |
| TG(16:1(9Z)/18:1(9Z)/20:4(5Z,8Z,11Z,14Z))[iso6]     | 1.11 | 0.35 | *** | ↓ |
| Arachidonic acid                                    | 1.10 | 0.25 | *** | ↓ |
| TG(16:0/16:1(9Z)/18:1(9Z))[iso6]                    | 1.10 | 0.32 | *** | ↓ |
| Eicosapentaenoic acid                               | 1.10 | 0.51 | *** | ↓ |
| TG(16:1(9Z)/18:2(9Z,12Z)/20:4(5Z,8Z,11Z,14Z))[iso6] | 1.09 | 1.31 | *** | ↑ |
| Stearic acid                                        | 1.09 | 2.64 | *** | ↑ |
| 9-HETE                                              | 1.09 | 1.00 | *** | ↑ |
| Lipoxin A4                                          | 1.09 | 0.71 | *** | ↓ |
| Leukotriene B4                                      | 1.08 | 0.85 | *** | ↓ |
| PC(o-16:0/22:0)                                     | 1.07 | 7.04 | *** | ↑ |
| PE(18:0/20:4(5Z,8Z,11Z,14Z))                        | 1.05 | 0.80 | *** | ↓ |
| TG(16:0/18:1(9Z)/18:2(9Z,12Z))[iso6]                | 1.05 | 9.21 | *** | ↑ |
| PS(18:0/20:4(5Z,8Z,11Z,14Z))                        | 1.04 | 0.90 | *** | ↓ |
| Resolvin E1                                         | 1.04 | 1.26 | **  | ↑ |
| 8-HETE                                              | 1.03 | 1.03 | **  | ↑ |
| 17-HDoHE                                            | 1.03 | 0.54 | **  | ↓ |
| PS(18:2(9Z,12Z)/18:2(9Z,12Z))                       | 1.03 | 0.59 | **  | ↓ |
| Docosahexaenoic acid                                | 1.01 | 0.26 | **  | ↓ |

“↑” for up-regulation and “↓” for down-regulation. “\*”, “\*\*” and “\*\*\*” indicate the difference is significant ( $P<0.05$ ), ( $P<0.01$ ) and ( $P<0.001$ ). VIP, variable importance for projection.

Table S10 The potential active metabolites between Yirui capsule group (YR+M) and control group (C) (VIP>1, p<0.05)

| Metabolites                                     | VIP  | Fold change | P value | Regulation (up or down) |
|-------------------------------------------------|------|-------------|---------|-------------------------|
| <b>YR+M vs. C</b>                               |      |             |         |                         |
| Capric acid                                     | 1.16 | /           | ***     | ↓                       |
| Eicosenoic acid                                 | 1.16 | 3.01        | ***     | ↑                       |
| TG(16:0/18:0/18:1(9Z))[iso6]                    | 1.16 | 13.93       | ***     | ↑                       |
| TG(16:1(9Z)/16:1(9Z)/18:1(9Z))[iso3]            | 1.15 | /           | ***     | ↑                       |
| LysoPE(0:0/18:0)                                | 1.15 | 2.92        | ***     | ↑                       |
| Oleic acid                                      | 1.15 | 2.36        | ***     | ↑                       |
| Arachidic acid                                  | 1.15 | /           | ***     | ↑                       |
| TG(18:0/18:1(9Z)/18:1(9Z))[iso3]                | 1.15 | 11.34       | ***     | ↑                       |
| TG(15:0/18:1(9Z)/18:1(9Z))[iso3]                | 1.15 | 56.96       | ***     | ↑                       |
| Lipoxin B4                                      | 1.15 | 0.26        | ***     | ↓                       |
| Resolvin D5                                     | 1.15 | 0.3         | ***     | ↓                       |
| 13-OxoODE                                       | 1.14 | 0.31        | ***     | ↓                       |
| 5,15-DiHETE                                     | 1.14 | 0.23        | ***     | ↓                       |
| 11,12-EpETrE                                    | 1.14 | 3.06        | ***     | ↑                       |
| 8,9-Epoxyeicosatrienoic acid                    | 1.14 | 2.7         | ***     | ↑                       |
| Eicosadienoic acid                              | 1.14 | /           | ***     | ↑                       |
| PE(16:0/22:0)                                   | 1.14 | 3.98        | ***     | ↑                       |
| PE(18:0/18:2(9Z,12Z))                           | 1.14 | 2.32        | ***     | ↑                       |
| TG(18:1(9Z)/18:2(9Z,12Z)/18:2(9Z,12Z))[iso3]    | 1.14 | 0.4         | ***     | ↓                       |
| TG(16:0/18:1(9Z)/20:1(11Z))[iso6]               | 1.14 | 2.58        | ***     | ↑                       |
| Thromboxane B2                                  | 1.13 | 2.08        | ***     | ↑                       |
| Docosahexaenoic acid                            | 1.13 | 3.29        | ***     | ↑                       |
| PE(18:0/18:0)                                   | 1.12 | 2.43        | ***     | ↑                       |
| 14,15-Epoxy-5,8,11-eicosatrienoic acid          | 1.12 | 2.82        | ***     | ↑                       |
| TG(18:1(9Z)/18:1(11Z)/18:1(9Z))[iso3]           | 1.12 | 5.89        | ***     | ↑                       |
| 5-HETE                                          | 1.12 | 0.27        | ***     | ↓                       |
| 5,6-Epoxy-8,11,14-eicosatrienoic acid           | 1.12 | 2.5         | ***     | ↑                       |
| TG(18:2(9Z,12Z)/18:2(9Z,12Z)/18:2(9Z,12Z))      | 1.11 | 0.18        | ***     | ↓                       |
| TG(16:1(9Z)/16:1(9Z)/20:4(5Z,8Z,11Z,14Z))[iso3] | 1.11 | 0.39        | ***     | ↓                       |
| LysoPE(16:0/0:0)                                | 1.11 | 1.94        | ***     | ↑                       |

|                                                 |      |      |     |   |
|-------------------------------------------------|------|------|-----|---|
| 5-HEPE                                          | 1.11 | 0.56 | *** | ↓ |
| LysoPE(18:2(9Z,12Z)/0:0)                        | 1.11 | 0.73 | *** | ↓ |
| TG(16:0/18:1(9Z)/18:1(9Z))[iso3]                | 1.11 | 3.54 | *** | ↑ |
| TG(18:1(9Z)/18:1(9Z)/18:3(9Z,12Z,15Z))[iso3]    | 1.11 | 1.99 | *** | ↑ |
| Prostaglandin F1a                               | 1.10 | 0.53 | *** | ↓ |
| Arachidonic acid                                | 1.10 | 2.49 | *** | ↑ |
| Prostaglandin F2a                               | 1.10 | 1.4  | *** | ↑ |
| 17-HDoHE                                        | 1.10 | 0.46 | *** | ↓ |
| Prostaglandin D2                                | 1.10 | 0.71 | *** | ↓ |
| TG(16:0/16:0/18:1(9Z))[iso3]                    | 1.10 | 3.67 | *** | ↑ |
| TG(16:1(9Z)/18:1(9Z)/20:4(5Z,8Z,11Z,14Z))[iso6] | 1.09 | 0.43 | *** | ↓ |
| LysoPE(18:1(9Z)/0:0)                            | 1.09 | 1.5  | *** | ↑ |
| PC(18:1(11Z)/18:0)                              | 1.09 | 7.78 | *** | ↑ |
| PC(16:0/18:1(9Z))                               | 1.09 | 4.39 | *** | ↑ |
| PC(16:0/16:0)                                   | 1.09 | 7.68 | *** | ↑ |
| LysoPC(20:5(5Z,8Z,11Z,14Z,17Z))                 | 1.09 | 4.84 | *** | ↑ |
| LysoPC(P-18:1(9Z))                              | 1.09 | 4.08 | *** | ↑ |
| PC(18:0/18:2(9Z,12Z))                           | 1.09 | 2.53 | *** | ↑ |
| PC(16:0/18:0)                                   | 1.09 | 7.48 | *** | ↑ |
| PC(16:0/22:2(13Z,16Z))                          | 1.09 | 4.88 | *** | ↑ |
| LysoPC(18:0)                                    | 1.09 | 2.16 | *** | ↑ |
| LysoPC(18:3(9Z,12Z,15Z))                        | 1.09 | 3.41 | *** | ↑ |
| 8,11,14-Eicosatrienoic acid                     | 1.09 | 2.2  | *** | ↑ |
| PC(o-14:0/16:1(9Z))                             | 1.09 | 3.13 | *** | ↑ |
| TG(16:1(9Z)/18:1(9Z)/18:1(9Z))[iso3]            | 1.09 | 3.22 | *** | ↑ |
| LysoPC(20:4(5Z,8Z,11Z,14Z))                     | 1.09 | 2.14 | *** | ↑ |
| 9-OxoODE                                        | 1.09 | 0.21 | *** | ↓ |
| PC(18:1(9Z)/20:0)                               | 1.09 | 5.3  | *** | ↑ |
| LysoPC(18:2(9Z,12Z))                            | 1.09 | 2.07 | *** | ↑ |
| PC(16:0/18:2(9Z,12Z))                           | 1.09 | 1.61 | *** | ↑ |
| LysoPC(16:1(9Z))                                | 1.09 | 2.08 | *** | ↑ |
| PC(o-18:1(9Z)/18:2(9Z,12Z))                     | 1.09 | 1.8  | *** | ↑ |
| 8-HETE                                          | 1.09 | 0.53 | *** | ↓ |

|                                                     |      |      |     |   |
|-----------------------------------------------------|------|------|-----|---|
| TG(16:0/16:1(9Z)/18:2(9Z,12Z))[iso6]                | 1.09 | 0.37 | *** | ↓ |
| PC(16:0/20:4(5Z,8Z,11Z,14Z))                        | 1.09 | 1.6  | *** | ↑ |
| 9-HETE                                              | 1.09 | 0.43 | *** | ↓ |
| PC(16:0/22:4(7Z,10Z,13Z,16Z))                       | 1.09 | 2.04 | *** | ↑ |
| PC(18:1(9Z)/22:4(7Z,10Z,13Z,16Z))                   | 1.09 | 1.78 | *** | ↑ |
| LysoPC(16:0)                                        | 1.09 | 1.52 | *** | ↑ |
| PC(18:1(9Z)/20:4(5Z,8Z,11Z,14Z))                    | 1.08 | 1.41 | *** | ↑ |
| Palmitoleic acid                                    | 1.08 | 1.62 | *** | ↑ |
| Eicosapentaenoic acid                               | 1.08 | 2.2  | *** | ↑ |
| PC(o-18:0/22:0)                                     | 1.07 | 0.69 | *** | ↓ |
| LysoPC(22:5(4Z,7Z,10Z,13Z,16Z))                     | 1.07 | 2.07 | *** | ↑ |
| 12-HEPE                                             | 1.07 | 0.41 | *** | ↓ |
| TG(16:1(9Z)/18:2(9Z,12Z)/20:4(5Z,8Z,11Z,14Z))[iso6] | 1.07 | 0.36 | *** | ↓ |
| TG(16:0/16:1(9Z)/18:1(9Z))[iso6]                    | 1.06 | 1.6  | *** | ↑ |
| TG(16:1(9Z)/18:1(9Z)/18:2(9Z,12Z))[iso6]            | 1.05 | 0.82 | *** | ↓ |
| TG(16:0/16:1(9Z)/20:4(5Z,8Z,11Z,14Z))[iso6]         | 1.05 | 0.54 | *** | ↓ |
| Myristic acid                                       | 1.04 | 0.79 | *** | ↓ |
| Prostaglandin F3a                                   | 1.03 | 1.46 | *** | ↑ |
| TG(16:0/18:1(9Z)/18:2(9Z,12Z))[iso6]                | 1.03 | 0.48 | *** | ↓ |
| TG(18:1(9Z)/18:1(9Z)/20:4(5Z,8Z,11Z,14Z))[iso3]     | 1.03 | 2.42 | *** | ↑ |
| Leukotriene B4                                      | 1.02 | 0.57 | *** | ↓ |
| PE(18:0/20:4(5Z,8Z,11Z,14Z))                        | 1.01 | 1.48 | *** | ↑ |
| PE(16:0/18:2(9Z,12Z))                               | 1.01 | 1.79 | **  | ↑ |
| 12-HETE                                             | 1.00 | 0.65 | **  | ↓ |
| Stearic acid                                        | 1.00 | 1.23 | **  | ↑ |

“↑” for up-regulation and “↓” for down-regulation. “\*”, “\*\*” and “\*\*\*” indicate the difference is significant ( $P<0.05$ ), ( $P<0.01$ ) and ( $P<0.001$ ). VIP, variable importance for projection.

Table S11 The potential active metabolites between antihypertensive peptides capsule group (APP+M) and control group (C) (VIP>1, p<0.05)

| Metabolites                                     | VIP  | Fold change | P value | Regulation (up or down) |
|-------------------------------------------------|------|-------------|---------|-------------------------|
| <b>APP+M vs. C</b>                              |      |             |         |                         |
| Oleic acid                                      | 1.18 | 2.08        | ***     | ↑                       |
| Arachidic acid                                  | 1.18 | /           | ***     | ↑                       |
| Eicosenoic acid                                 | 1.17 | 3.12        | ***     | ↑                       |
| Resolvin D5                                     | 1.17 | 0.16        | ***     | ↓                       |
| 8,11,14-Eicosatrienoic acid                     | 1.17 | 1.81        | ***     | ↑                       |
| 14,15-Epoxy-5,8,11-eicosatrienoic acid          | 1.17 | 3.36        | ***     | ↑                       |
| 5,15-DiHETE                                     | 1.17 | 0.35        | ***     | ↓                       |
| TG(18:1(9Z)/18:2(9Z,12Z)/18:2(9Z,12Z))[iso3]    | 1.16 | 0.33        | ***     | ↓                       |
| 13-OxoODE                                       | 1.16 | 0.35        | ***     | ↓                       |
| Prostaglandin F1a                               | 1.16 | 0.37        | ***     | ↓                       |
| 11,12-EpETrE                                    | 1.16 | 3.41        | ***     | ↑                       |
| PC(18:1(11Z)/18:0)                              | 1.15 | 6.93        | ***     | ↑                       |
| Capric acid                                     | 1.15 | 1.51        | ***     | ↑                       |
| PC(16:0/16:0)                                   | 1.15 | 7.23        | ***     | ↑                       |
| TG(15:0/18:1(9Z)/18:1(9Z))[iso3]                | 1.15 | 63.18       | ***     | ↑                       |
| PC(o-18:0/22:0)                                 | 1.15 | 0.57        | ***     | ↓                       |
| Thromboxane B2                                  | 1.15 | 2.38        | ***     | ↑                       |
| PC(16:0/18:1(9Z))                               | 1.15 | 4.13        | ***     | ↑                       |
| PC(18:1(9Z)/20:0)                               | 1.15 | 5.09        | ***     | ↑                       |
| TG(16:1(9Z)/16:1(9Z)/20:4(5Z,8Z,11Z,14Z))[iso3] | 1.15 | 0.28        | ***     | ↓                       |
| PC(16:0/18:0)                                   | 1.15 | 7.11        | ***     | ↑                       |
| 8,9-Epoxyeicosatrienoic acid                    | 1.15 | 2.67        | ***     | ↑                       |
| Lipoxin B4                                      | 1.15 | 0.49        | ***     | ↓                       |
| Resolvin D2                                     | 1.14 | 0.36        | ***     | ↓                       |
| TG(18:2(9Z,12Z)/18:2(9Z,12Z)/18:2(9Z,12Z))      | 1.14 | 0.15        | ***     | ↓                       |
| LysoPE(0:0/18:0)                                | 1.14 | 2.91        | ***     | ↑                       |
| PC(16:0/22:2(13Z,16Z))                          | 1.14 | 4.83        | ***     | ↑                       |
| 5-HETE                                          | 1.14 | 0.32        | ***     | ↓                       |
| PE(18:0/18:2(9Z,12Z))                           | 1.14 | 1.69        | ***     | ↑                       |

|                                                     |      |       |     |   |
|-----------------------------------------------------|------|-------|-----|---|
| TG(16:0/18:0/18:1(9Z))[iso6]                        | 1.14 | 13.42 | *** | ↑ |
| TG(18:0/18:1(9Z)/18:1(9Z))[iso3]                    | 1.13 | 11.77 | *** | ↑ |
| LysoPC(P-18:1(9Z))                                  | 1.13 | 3.7   | *** | ↑ |
| LysoPE(18:2(9Z,12Z)/0:0)                            | 1.12 | 0.57  | *** | ↓ |
| TG(16:0/16:1(9Z)/18:2(9Z,12Z))[iso6]                | 1.12 | 0.29  | *** | ↓ |
| 17-HDoHE                                            | 1.12 | 0.45  | *** | ↓ |
| 12-HEPE                                             | 1.12 | 0.29  | *** | ↓ |
| 9-OxoODE                                            | 1.12 | 0.17  | *** | ↓ |
| PC(18:0/18:2(9Z,12Z))                               | 1.12 | 2.24  | *** | ↑ |
| PC(o-14:0/16:1(9Z))                                 | 1.12 | 2.48  | *** | ↑ |
| Myristic acid                                       | 1.12 | 0.76  | *** | ↓ |
| 9-HETE                                              | 1.12 | 0.4   | *** | ↓ |
| LysoPC(20:5(5Z,8Z,11Z,14Z,17Z))                     | 1.11 | 3.57  | *** | ↑ |
| TG(16:1(9Z)/16:1(9Z)/18:1(9Z))[iso3]                | 1.11 | /     | *** | ↑ |
| PC(16:0/22:4(7Z,10Z,13Z,16Z))                       | 1.11 | 2.04  | *** | ↑ |
| 5-HEPE                                              | 1.11 | 0.63  | *** | ↓ |
| Prostaglandin F2a                                   | 1.11 | 1.51  | *** | ↑ |
| LysoPC(18:3(9Z,12Z,15Z))                            | 1.11 | 2.94  | *** | ↑ |
| TG(16:1(9Z)/18:1(9Z)/20:4(5Z,8Z,11Z,14Z))[iso6]     | 1.11 | 0.43  | *** | ↓ |
| LysoPE(16:0/0:0)                                    | 1.10 | 2.04  | *** | ↑ |
| TG(16:0/18:1(9Z)/20:1(11Z))[iso6]                   | 1.10 | 2.93  | *** | ↑ |
| PE(16:0/22:0)                                       | 1.10 | 3.28  | *** | ↑ |
| PE(16:1(9Z)/22:0)                                   | 1.10 | 2.5   | *** | ↑ |
| TG(16:0/18:1(9Z)/18:2(9Z,12Z))[iso6]                | 1.10 | 0.35  | *** | ↓ |
| Lipoxin A4                                          | 1.10 | 0.21  | *** | ↓ |
| TG(16:1(9Z)/18:2(9Z,12Z)/20:4(5Z,8Z,11Z,14Z))[iso6] | 1.09 | 0.32  | *** | ↓ |
| PE(18:0/18:0)                                       | 1.09 | 2.7   | *** | ↑ |
| PC(18:1(9Z)/22:4(7Z,10Z,13Z,16Z))                   | 1.09 | 1.71  | *** | ↑ |
| TG(18:1(9Z)/18:1(11Z)/18:1(9Z))[iso3]               | 1.09 | 4.76  | *** | ↑ |
| LysoPC(18:0)                                        | 1.09 | 1.96  | *** | ↑ |
| TG(16:1(9Z)/18:1(9Z)/18:2(9Z,12Z))[iso6]            | 1.08 | 0.67  | *** | ↓ |
| LysoPC(20:4(5Z,8Z,11Z,14Z))                         | 1.08 | 2.17  | *** | ↑ |
| Stearic acid                                        | 1.08 | 1.28  | *** | ↑ |



|                                                 |      |      |     |   |
|-------------------------------------------------|------|------|-----|---|
| TG(16:0/18:1(9Z)/18:1(9Z))[iso3]                | 1.07 | 2.84 | *** | ↑ |
| 6-Keto-prostaglandin F1a                        | 1.06 | 2.19 | *** | ↑ |
| LysoPC(18:2(9Z,12Z))                            | 1.06 | 1.86 | *** | ↑ |
| TG(18:1(9Z)/18:1(9Z)/18:3(9Z,12Z,15Z))[iso3]    | 1.06 | 1.59 | *** | ↑ |
| Arachidonic acid                                | 1.06 | 0.58 | *** | ↓ |
| TG(16:0/16:0/18:1(9Z))[iso3]                    | 1.05 | 3.01 | *** | ↑ |
| 8-HETE                                          | 1.05 | 0.63 | *** | ↓ |
| PC(16:0/20:4(5Z,8Z,11Z,14Z))                    | 1.05 | 1.63 | *** | ↑ |
| TG(18:1(9Z)/18:1(9Z)/20:4(5Z,8Z,11Z,14Z))[iso3] | 1.05 | 2.42 | *** | ↑ |
| Prostaglandin D3                                | 1.05 | 0.48 | *** | ↓ |
| LysoPC(16:1(9Z))                                | 1.05 | 1.87 | *** | ↑ |
| LysoPC(22:5(4Z,7Z,10Z,13Z,16Z))                 | 1.05 | 1.98 | *** | ↑ |
| PC( $\alpha$ -18:1(9Z)/18:2(9Z,12Z))            | 1.04 | 1.57 | *** | ↑ |
| PC(16:0/18:2(9Z,12Z))                           | 1.04 | 1.5  | *** | ↑ |
| TG(16:0/16:1(9Z)/20:4(5Z,8Z,11Z,14Z))[iso6]     | 1.03 | 0.55 | **  | ↓ |
| PE(20:4(5Z,8Z,11Z,14Z)/20:4(5Z,8Z,11Z,14Z))     | 1.03 | 2.26 | *** | ↑ |
| TG(16:1(9Z)/18:1(9Z)/18:1(9Z))[iso3]            | 1.03 | 2.41 | *** | ↑ |
| Docosahexaenoic acid                            | 1.02 | 0.55 | **  | ↓ |
| Prostaglandin D2                                | 1.02 | 0.76 | **  | ↓ |
| Eicosapentaenoic acid                           | 1.01 | 0.65 | **  | ↓ |
| TG(18:0/18:2(9Z,12Z)/20:1(11Z))[iso6]           | 1.00 | 1.84 | **  | ↑ |

“↑” for up-regulation and “↓” for down-regulation. “\*”, “\*\*” and “\*\*\*” indicate the difference is significant ( $P<0.05$ ), ( $P<0.01$ ) and ( $P<0.001$ ). VIP, variable importance for projection.

Table S12 The potential active metabolites between lemon apple vinegar drink group (LAV+M) and control group (C) (VIP>1, p<0.05)

| Metabolites                          | VIP  | Fold change | P value | Regulation (up or down) |
|--------------------------------------|------|-------------|---------|-------------------------|
| <b>LAV+M vs. C</b>                   |      |             |         |                         |
| LysoPC(P-18:1(9Z))                   | 1.21 | 3.79        | ***     | ↑                       |
| Arachidic acid                       | 1.21 | /           | ***     | ↑                       |
| PC(18:1(11Z)/18:0)                   | 1.21 | 7.32        | ***     | ↑                       |
| LysoPC(18:0)                         | 1.21 | 2.13        | ***     | ↑                       |
| PC(16:0/16:0)                        | 1.21 | 7.56        | ***     | ↑                       |
| PC(16:0/18:1(9Z))                    | 1.21 | 4.17        | ***     | ↑                       |
| LysoPC(20:5(5Z,8Z,11Z,14Z,17Z))      | 1.21 | 3.77        | ***     | ↑                       |
| PC(16:0/22:4(7Z,10Z,13Z,16Z))        | 1.20 | 2.23        | ***     | ↑                       |
| LysoPC(20:4(5Z,8Z,11Z,14Z))          | 1.20 | 2.43        | ***     | ↑                       |
| PC(16:0/18:0)                        | 1.20 | 7.31        | ***     | ↑                       |
| Eicosenoic acid                      | 1.20 | 2.76        | ***     | ↑                       |
| PC(18:0/18:2(9Z,12Z))                | 1.20 | 2.32        | ***     | ↑                       |
| LysoPC(18:2(9Z,12Z))                 | 1.20 | 1.91        | ***     | ↑                       |
| PC(16:0/20:4(5Z,8Z,11Z,14Z))         | 1.20 | 1.77        | ***     | ↑                       |
| LysoPC(18:3(9Z,12Z,15Z))             | 1.20 | 2.82        | ***     | ↑                       |
| LysoPC(16:1(9Z))                     | 1.20 | 1.9         | ***     | ↑                       |
| PC(o-18:0/22:0)                      | 1.20 | 0.58        | ***     | ↓                       |
| LysoPC(16:0)                         | 1.20 | 1.51        | ***     | ↑                       |
| PC(18:1(9Z)/20:0)                    | 1.20 | 5.09        | ***     | ↑                       |
| Thromboxane B2                       | 1.20 | 2.29        | ***     | ↑                       |
| Oleic acid                           | 1.20 | 2.01        | ***     | ↑                       |
| LysoPE(0:0/18:0)                     | 1.20 | 3.09        | ***     | ↑                       |
| PC(18:1(9Z)/22:4(7Z,10Z,13Z,16Z))    | 1.20 | 1.77        | ***     | ↑                       |
| PC(16:0/22:2(13Z,16Z))               | 1.20 | 5.24        | ***     | ↑                       |
| PC(o-18:1(9Z)/18:2(9Z,12Z))          | 1.20 | 1.63        | ***     | ↑                       |
| Lipoxin B4                           | 1.20 | 0.2         | ***     | ↓                       |
| PC(16:0/18:2(9Z,12Z))                | 1.19 | 1.5         | ***     | ↑                       |
| TG(16:1(9Z)/16:1(9Z)/18:1(9Z))[iso3] | 1.19 | /           | ***     | ↑                       |
| LysoPE(18:2(9Z,12Z)/0:0)             | 1.19 | 0.6         | ***     | ↓                       |
| TG(15:0/18:1(9Z)/18:1(9Z))[iso3]     | 1.19 | 60.69       | ***     | ↑                       |

|                                                     |      |      |     |   |
|-----------------------------------------------------|------|------|-----|---|
| Resolvin D5                                         | 1.19 | 0.22 | *** | ↓ |
| PC(18:1(9Z)/20:4(5Z,8Z,11Z,14Z))                    | 1.19 | 1.38 | *** | ↑ |
| PC(o-14:0/16:1(9Z))                                 | 1.19 | 2.83 | *** | ↑ |
| TG(18:1(9Z)/18:2(9Z,12Z)/18:2(9Z,12Z))[iso3]        | 1.19 | 0.29 | *** | ↓ |
| TG(16:1(9Z)/18:1(9Z)/18:2(9Z,12Z))[iso6]            | 1.18 | 0.5  | *** | ↓ |
| Prostaglandin F1a                                   | 1.18 | 0.42 | *** | ↓ |
| LysoPE(16:0/0:0)                                    | 1.18 | 2.08 | *** | ↑ |
| TG(18:0/18:1(9Z)/18:1(9Z))[iso3]                    | 1.18 | 6.73 | *** | ↑ |
| PE(16:0/22:0)                                       | 1.18 | 3.09 | *** | ↑ |
| TG(16:1(9Z)/16:1(9Z)/20:4(5Z,8Z,11Z,14Z))[iso3]     | 1.18 | 0.23 | *** | ↓ |
| 5,15-DiHETE                                         | 1.17 | 0.47 | *** | ↓ |
| TG(16:0/18:1(9Z)/18:1(9Z))[iso3]                    | 1.17 | 2.47 | *** | ↑ |
| 5,6-Epoxy-8,11,14-eicosatrienoic acid               | 1.17 | 0.37 | *** | ↓ |
| TG(18:2(9Z,12Z)/18:2(9Z,12Z)/18:2(9Z,12Z))          | 1.16 | 0.14 | *** | ↓ |
| TG(16:0/18:0/18:1(9Z))[iso6]                        | 1.16 | 7.1  | *** | ↑ |
| Myristic acid                                       | 1.16 | 0.68 | *** | ↓ |
| 5-HETE                                              | 1.16 | 0.33 | *** | ↓ |
| TG(16:0/16:1(9Z)/18:2(9Z,12Z))[iso6]                | 1.16 | 0.22 | *** | ↓ |
| TG(16:1(9Z)/18:1(9Z)/20:4(5Z,8Z,11Z,14Z))[iso6]     | 1.16 | 0.34 | *** | ↓ |
| Prostaglandin F3a                                   | 1.16 | 0.35 | *** | ↓ |
| LysoPC(22:5(4Z,7Z,10Z,13Z,16Z))                     | 1.15 | 2.02 | *** | ↑ |
| TG(18:1(9Z)/18:1(11Z)/18:1(9Z))[iso3]               | 1.15 | 4.32 | *** | ↑ |
| PE(18:0/18:0)                                       | 1.15 | 2.2  | *** | ↑ |
| TG(16:0/18:1(9Z)/20:1(11Z))[iso6]                   | 1.15 | 2.67 | *** | ↑ |
| 13-OxoODE                                           | 1.15 | 0.59 | *** | ↓ |
| 9-OxoODE                                            | 1.14 | 0.17 | *** | ↓ |
| 12-HEPE                                             | 1.14 | 0.32 | *** | ↓ |
| TG(16:0/18:1(9Z)/18:2(9Z,12Z))[iso6]                | 1.14 | 0.25 | *** | ↓ |
| TG(16:1(9Z)/18:2(9Z,12Z)/20:4(5Z,8Z,11Z,14Z))[iso6] | 1.13 | 0.28 | *** | ↓ |
| 17-HDoHE                                            | 1.13 | 0.52 | *** | ↓ |
| 6-Keto-prostaglandin F1a                            | 1.13 | 2.44 | *** | ↑ |
| Prostaglandin F2a                                   | 1.12 | 1.84 | *** | ↑ |
| Resolvin E1                                         | 1.12 | 0.63 | *** | ↓ |

|                                                 |      |      |     |   |
|-------------------------------------------------|------|------|-----|---|
| PE(20:4(5Z,8Z,11Z,14Z)/20:4(5Z,8Z,11Z,14Z))     | 1.12 | 2.25 | *** | ↑ |
| 9-HETE                                          | 1.11 | 0.51 | *** | ↓ |
| PE(18:0/18:2(9Z,12Z))                           | 1.11 | 1.86 | *** | ↑ |
| Prostaglandin D3                                | 1.11 | 0.36 | *** | ↓ |
| PC(16:0/22:6(4Z,7Z,10Z,13Z,16Z,19Z))            | 1.11 | 0.89 | *** | ↓ |
| Lipoxin A4                                      | 1.11 | 0.24 | *** | ↓ |
| Linoleic acid                                   | 1.10 | 0.68 | *** | ↓ |
| 5-HEPE                                          | 1.10 | 0.67 | *** | ↓ |
| TG(16:0/16:1(9Z)/20:4(5Z,8Z,11Z,14Z))[iso6]     | 1.08 | 0.52 | *** | ↓ |
| LysoPE(18:1(9Z)/0:0)                            | 1.08 | 1.63 | *** | ↑ |
| TG(18:0/18:2(9Z,12Z)/20:1(11Z))[iso6]           | 1.07 | 1.58 | *** | ↑ |
| TG(18:0/18:2(9Z,12Z)/18:2(9Z,12Z))[iso3]        | 1.06 | 0.45 | *** | ↓ |
| PE(16:1(9Z)/22:0)                               | 1.06 | 1.93 | *** | ↑ |
| 20-Hydroxyeicosatetraenoic acid                 | 1.05 | 1.41 | **  | ↑ |
| PE(18:0/20:4(5Z,8Z,11Z,14Z))                    | 1.02 | 1.32 | **  | ↑ |
| TG(16:0/16:0/18:1(9Z))[iso3]                    | 1.02 | 1.73 | **  | ↑ |
| TG(18:1(9Z)/18:1(9Z)/20:4(5Z,8Z,11Z,14Z))[iso3] | 1.01 | 1.76 | **  | ↑ |
| Capric acid                                     | 1.01 | 1.34 | **  | ↑ |
| PS(18:2(9Z,12Z)/18:2(9Z,12Z))                   | 1.01 | 2.14 | **  | ↑ |

“↑” for up-regulation and “↓” for down-regulation. “\*”, “\*\*” and “\*\*\*” indicate the difference is significant ( $P<0.05$ ), ( $P<0.01$ ) and ( $P<0.001$ ). VIP, variable importance for projection.

Table S13 The potential active metabolites between seal oil capsule group (SO+M) and control group (C) (VIP>1,  $p<0.05$ )

| Metabolites                                  | VIP  | Fold change | P value | Regulation (up or down) |
|----------------------------------------------|------|-------------|---------|-------------------------|
| <b>SO+M vs. C</b>                            |      |             |         |                         |
| PC(16:0/16:0)                                | 1.17 | 8.83        | ***     | ↑                       |
| PC(16:0/18:0)                                | 1.17 | 8.6         | ***     | ↑                       |
| PC(18:1(11Z)/18:0)                           | 1.17 | 8.68        | ***     | ↑                       |
| PC(18:0/18:2(9Z,12Z))                        | 1.17 | 2.81        | ***     | ↑                       |
| PC(16:0/18:1(9Z))                            | 1.17 | 4.39        | ***     | ↑                       |
| LysoPC(P-18:1(9Z))                           | 1.17 | 3.65        | ***     | ↑                       |
| LysoPC(20:5(5Z,8Z,11Z,14Z,17Z))              | 1.17 | 20.84       | ***     | ↑                       |
| PC(16:0/22:2(13Z,16Z))                       | 1.17 | 5.76        | ***     | ↑                       |
| PC(16:0/18:2(9Z,12Z))                        | 1.17 | 1.72        | ***     | ↑                       |
| PC(o-18:1(9Z)/18:2(9Z,12Z))                  | 1.17 | 1.72        | ***     | ↑                       |
| LysoPC(18:0)                                 | 1.17 | 2.03        | ***     | ↑                       |
| PC(18:1(9Z)/20:4(5Z,8Z,11Z,14Z))             | 1.17 | 1.82        | ***     | ↑                       |
| PC(o-14:0/16:1(9Z))                          | 1.17 | 2.76        | ***     | ↑                       |
| 19(S)-HETE                                   | 1.17 | 0.51        | ***     | ↓                       |
| LysoPC(18:3(9Z,12Z,15Z))                     | 1.17 | 2.2         | ***     | ↑                       |
| 5,15-DiHETE                                  | 1.17 | 0.11        | ***     | ↓                       |
| LysoPC(18:2(9Z,12Z))                         | 1.17 | 1.96        | ***     | ↑                       |
| LysoPC(16:1(9Z))                             | 1.17 | 1.86        | ***     | ↑                       |
| PC(18:1(9Z)/20:0)                            | 1.17 | 5.74        | ***     | ↑                       |
| LysoPE(0:0/18:0)                             | 1.17 | 3.59        | ***     | ↑                       |
| Lipoxin B4                                   | 1.17 | 0.15        | ***     | ↓                       |
| PC(18:1(9Z)/22:4(7Z,10Z,13Z,16Z))            | 1.16 | 1.76        | ***     | ↑                       |
| PE(16:0/22:0)                                | 1.16 | 5.05        | ***     | ↑                       |
| PC(o-16:0/22:0)                              | 1.16 | 1.51        | ***     | ↑                       |
| TG(18:1(9Z)/18:2(9Z,12Z)/18:2(9Z,12Z))[iso3] | 1.16 | 0.2         | ***     | ↓                       |
| PC(o-18:0/22:0)                              | 1.16 | 0.7         | ***     | ↓                       |
| LysoPC(16:0)                                 | 1.16 | 1.4         | ***     | ↑                       |
| TG(16:1(9Z)/18:1(9Z)/18:2(9Z,12Z))[iso6]     | 1.16 | 0.34        | ***     | ↓                       |
| Palmitic acid                                | 1.16 | 0.38        | ***     | ↓                       |
| Eicosapentaenoic acid                        | 1.16 | 8.1         | ***     | ↑                       |
| Resolvin D5                                  | 1.16 | 0.25        | ***     | ↓                       |

|                                                     |      |       |     |   |
|-----------------------------------------------------|------|-------|-----|---|
| Linoleic acid                                       | 1.15 | 0.22  | *** | ↓ |
| LysoPE(16:0/0:0)                                    | 1.15 | 2.3   | *** | ↑ |
| Myristic acid                                       | 1.15 | 0.47  | *** | ↓ |
| 8,11,14-Eicosatrienoic acid                         | 1.15 | 0.17  | *** | ↓ |
| PE(18:0/18:2(9Z,12Z))                               | 1.15 | 2.14  | *** | ↑ |
| Resolvin E1                                         | 1.14 | 0.35  | *** | ↓ |
| 5-HEPE                                              | 1.14 | 2.8   | *** | ↑ |
| TG(16:0/18:0/18:1(9Z))[iso6]                        | 1.14 | 15.83 | *** | ↑ |
| TG(16:1(9Z)/18:1(9Z)/20:4(5Z,8Z,11Z,14Z))[iso6]     | 1.14 | 0.2   | *** | ↓ |
| TG(16:1(9Z)/16:1(9Z)/18:1(9Z))[iso3]                | 1.14 | /     | *** | ↑ |
| Palmitoleic acid                                    | 1.14 | 0.18  | *** | ↓ |
| Thromboxane B2                                      | 1.14 | 1.86  | *** | ↑ |
| TG(18:2(9Z,12Z)/18:2(9Z,12Z)/18:2(9Z,12Z))          | 1.14 | 0.09  | *** | ↓ |
| Oleic acid                                          | 1.14 | 0.52  | *** | ↓ |
| 5-HETE                                              | 1.14 | 0.25  | *** | ↓ |
| Docosahexaenoic acid                                | 1.14 | 3.44  | *** | ↑ |
| TG(16:0/16:1(9Z)/18:2(9Z,12Z))[iso6]                | 1.13 | 0.16  | *** | ↓ |
| TG(16:0/16:1(9Z)/20:4(5Z,8Z,11Z,14Z))[iso6]         | 1.13 | 0.24  | *** | ↓ |
| 9-HETE                                              | 1.13 | 0.29  | *** | ↓ |
| TG(15:0/18:1(9Z)/18:1(9Z))[iso3]                    | 1.13 | 90.57 | *** | ↑ |
| 12-HEPE                                             | 1.13 | 2.83  | *** | ↑ |
| TG(16:1(9Z)/16:1(9Z)/20:4(5Z,8Z,11Z,14Z))[iso3]     | 1.13 | 0.39  | *** | ↓ |
| Eicosenoic acid                                     | 1.12 | 0.33  | *** | ↓ |
| TG(16:0/18:1(9Z)/18:2(9Z,12Z))[iso6]                | 1.12 | 0.19  | *** | ↓ |
| TG(16:1(9Z)/18:2(9Z,12Z)/20:4(5Z,8Z,11Z,14Z))[iso6] | 1.12 | 0.17  | *** | ↓ |
| LysoPE(18:2(9Z,12Z)/0:0)                            | 1.12 | 0.68  | *** | ↓ |
| PE(18:0/18:0)                                       | 1.11 | 2.91  | *** | ↑ |
| Prostaglandin F1a                                   | 1.11 | 0.57  | *** | ↓ |
| PE(16:1(9Z)/22:0)                                   | 1.11 | 3.62  | *** | ↑ |
| PS(18:2(9Z,12Z)/18:2(9Z,12Z))                       | 1.10 | 2.33  | *** | ↑ |
| Capric acid                                         | 1.10 | 0.34  | *** | ↓ |
| TG(18:0/18:1(9Z)/18:1(9Z))[iso3]                    | 1.09 | 14.88 | *** | ↑ |
| TG(16:0/18:1(9Z)/18:1(9Z))[iso3]                    | 1.09 | 1.83  | *** | ↑ |

|                                          |      |      |     |   |
|------------------------------------------|------|------|-----|---|
| 9-OxoODE                                 | 1.09 | 0.29 | *** | ↓ |
| PC(16:0/22:6(4Z,7Z,10Z,13Z,16Z,19Z))     | 1.09 | 1.1  | *** | ↑ |
| Prostaglandin D2                         | 1.09 | 0.6  | *** | ↓ |
| PE(18:2(9Z,12Z)/18:2(9Z,12Z))            | 1.09 | 0.58 | *** | ↓ |
| PC(16:0/22:4(7Z,10Z,13Z,16Z))            | 1.09 | 1.1  | *** | ↑ |
| TG(16:0/16:0/18:1(9Z))[iso3]             | 1.08 | 1.62 | *** | ↑ |
| Leukotriene B4                           | 1.08 | 0.48 | *** | ↓ |
| Alpha-Linolenic acid                     | 1.07 | 0.13 | *** | ↓ |
| PS(18:0/20:4(5Z,8Z,11Z,14Z))             | 1.07 | 3.45 | *** | ↑ |
| TG(18:0/18:2(9Z,12Z)/20:1(11Z))[iso6]    | 1.06 | 2.67 | *** | ↑ |
| TG(18:0/18:2(9Z,12Z)/18:2(9Z,12Z))[iso3] | 1.06 | 0.48 | *** | ↓ |
| Stearic acid                             | 1.06 | 0.7  | *** | ↓ |
| LysoPC(22:5(4Z,7Z,10Z,13Z,16Z))          | 1.04 | 1.92 | *** | ↑ |
| TG(18:1(9Z)/18:1(9Z)/18:2(9Z,12Z))[iso3] | 1.04 | 0.43 | *** | ↓ |
| PC(16:0/20:4(5Z,8Z,11Z,14Z))             | 1.03 | 0.93 | *** | ↓ |
| TG(16:0/18:1(9Z)/20:1(11Z))[iso6]        | 1.03 | 3.75 | *** | ↑ |
| TG(18:1(9Z)/18:1(11Z)/18:1(9Z))[iso3]    | 1.01 | 2.39 | **  | ↑ |

“↑” for up-regulation and “↓” for down-regulation. “\*”, “\*\*” and “\*\*\*” indicate the difference is significant ( $P<0.05$ ), ( $P<0.01$ ) and ( $P<0.001$ ). VIP, variable importance for projection.

Table S14 Concentration of lipid mediators in mice serum samples.

| C | M | YR+M | APP+M | LAV+M | SO+M |
|---|---|------|-------|-------|------|
|---|---|------|-------|-------|------|

|                          |                  |               |               |                |               |                 |                |
|--------------------------|------------------|---------------|---------------|----------------|---------------|-----------------|----------------|
| Cyclooxygenase pathway   | PGD <sub>2</sub> | 6.8±0.46a     | 6.52±0.75a    | 4.84±0.24bc    | 5.13±0.67b    | 6.34±0.63a      | 4.1±0.74c      |
|                          | PGE <sub>2</sub> | 4.9±0.49ab    | 5.09±0.31a    | 4.13±0.37c     | 4.16±0.59c    | 4.35±0.18bc     | 4.55±0.48abc   |
|                          | TXB <sub>2</sub> | 125.4±8.35e   | 394.2±22.93a  | 260.4±24.64cd  | 298.6±30.81b  | 287±9.87bc      | 233.2±19.9d    |
|                          | TXB <sub>3</sub> | 3.94±0.37c    | 7.06±0.53b    | 6.3±0.66bc     | 6.05±0.49bc   | 6.07±0.68bc     | 30.88±4.46a    |
|                          | RvE1             | 8.37±0.85a    | 5.97±0.64bc   | 6.43±0.83b     | 5.81±1.12bc   | 5.27±0.51c      | 2.9±0.51d      |
| 5-lipoxygenase pathway   | 5-HETE           | 82.4±12.26a   | 23.11±3.05b   | 22.64±3.04b    | 26.58±1.84b   | 26.95±2.95b     | 20.97±3.15b    |
|                          | LTB <sub>4</sub> | 1.66±0.28a    | 0.76±0.17d    | 0.94±0.13cd    | 1.25±0.17b    | 1.15±0.16bc     | 0.79±0.11d     |
|                          | LXA <sub>4</sub> | 2.39±0.59a    | 0.58±0.21c    | 2.27±0.52a     | 0.5±0.19c     | 0.58±0.24c      | 1.17±0.49b     |
|                          | LXB <sub>4</sub> | 12.02±0.94a   | 3±0.37c       | 3.12±0.44c     | 5.86±0.93b    | 2.44±0.34cd     | 1.78±0.33d     |
| 12-lipoxygenase pathway  | 12-HETE          | 9562±1272.6c  | 9876±561.36bc | 6210±843.71d   | 11400±758.29a | 11008±1599.98ab | 6652±1108.27d  |
|                          | 14-HDHA          | 2008±84.68c   | 1784±189.42c  | 1882±265.93c   | 1796±240.27c  | 2352±280.12b    | 3266±281.12a   |
|                          | RvD1             | 0.85±0.18b    | 1.07±0.14a    | 0.9±0.21ab     | 0.48±0.08c    | 0.53±0.18c      | 0.64±0.13c     |
|                          | RvD2             | 5.17±0.61a    | 1.33±0.19c    | 4.07±0.49b     | 1.84±0.3c     | 5.51±1.1a       | 3.92±0.43b     |
|                          | RvD3             | 0.57±0.18a    | 0.23±0.08cd   | 0.31±0.07bc    | 0.12±0.01d    | 0.33±0.15bc     | 0.45±0.15ab    |
|                          | RvD5             | 2.05±0.16a    | 0.53±0.1b     | 0.6±0.09b      | 0.33±0.07c    | 0.45±0.13bc     | 0.51±0.15b     |
|                          | MaR1             | 4.9±0.66a     | 0.46±0.09b    | 0.55±0.1bc     | 0.48±0.09bc   | 0.45±0.08bc     | 1.56±0.19a     |
| 15-lipoxygenase pathway  | 15-HETE          | 160.4±23.95a  | 136.4±17.17b  | 76.06±6.15e    | 98±9.28cd     | 110.24±14.29c   | 85.2±7.55de    |
|                          | 17-HDHA          | 352.6±47.44a  | 225.4±31.57b  | 162.6±15.04c   | 158.8±15.99c  | 183.8±19.59c    | 354.8±21.53a   |
|                          | 9-oxoODE         | 82.84±18.28a  | 13.86±2.95c   | 17.14±1.59bc   | 14.1±1.29c    | 13.9±2.16c      | 24.4±3.87b     |
|                          | 13-oxoODE        | 89.5±7.41a    | 14.94±2.45e   | 27.62±2.3d     | 31.58±3.81d   | 52.44±6.26c     | 82.38±6.31b    |
|                          | PDX              | 2.84±0.35a    | 0.81±0.08cd   | 0.56±0.08de    | 0.45±0.11e    | 0.84±0.13c      | 1.39±0.33b     |
| Alternative pathway      | 20-HETE          | 9.44±0.88cd   | 12.1±1.64ab   | 9.97±1.23c     | 10.64±0.94bc  | 13.34±1.51a     | 8.29±0.3d      |
|                          | 5,6-EET          | 5848±748.18bc | 5596±1013.18c | 14640±1722.79a | 4632±560.95c  | 2144±242.24d    | 7078±1314.96bc |
|                          | 8,9-EET          | 286.6±26.67c  | 390.2±60.78b  | 775.2±57.54a   | 766.2±90.06a  | 329.6±45.2bc    | 266.8±28.73c   |
|                          | 11,12-EET        | 233.2±26.29cd | 192.4±22.2d   | 713.6±54.84b   | 796.2±85.83a  | 297.8±56.41c    | 236.4±31.14cd  |
|                          | 14,15-EET        | 337.4±38.93c  | 388±60.25c    | 952±113.23b    | 1132.6±86.71a | 402.4±61.33c    | 357.8±47.04c   |
|                          | 18-HEPE          | 12.06±2.11b   | 1.93±0.23c    | 3.65±0.38c     | 3.4±0.86c     | 3.68±0.19c      | 40.18±2.85a    |
| PUFA-ratios              | EPA/AA           | 0.25±0.02b    | 0.27±0.07b    | 0.22±0.02b     | 0.28±0.05b    | 0.25±0.04b      | 1.85±0.34a     |
|                          | DHA/AA           | 0.64±0.09c    | 0.73±0.17bc   | 0.85±0.07b     | 0.6±0.06c     | 0.75±0.1bc      | 2±0.3a         |
| HEPE or HDHA/HETE ratios | HEPE/HETE ratio  | 0.18±0.01b    | 0.12±0.01c    | 0.15±0.02b     | 0.09±0.01c    | 0.11±0.03c      | 0.72±0.04a     |
|                          | HDHA/HETE ratio  | 0.24±0.03c    | 0.2±0.02de    | 0.32±0.03b     | 0.17±0.03e    | 0.23±0.02cd     | 0.54±0.05a     |



(a, b, c, d, e (p<0.05)); there is no significant difference when the mark contains the same letter

Table S15 Concentration of FFA,PL and TAG in mice serum samples.

|     |                        | C              | M              | YR+M            | APP+M           | LAV+M          | SO+M            |
|-----|------------------------|----------------|----------------|-----------------|-----------------|----------------|-----------------|
| FFA | Total FFA(nmol/mL)     | 126.86±5.86d   | 183.24±1.96a   | 159.72±9.52b    | 145.77±2.78c    | 140.15±1.81c   | 48.07±5.61e     |
|     | EPA(pmol/mL)           | 496.6±62.97c   | 271±37.37c     | 1091.8±176.2b   | 322.2±54.01c    | 487.8±41.55c   | 4024±499.58a    |
|     | DHA(pmol/mL)           | 1266±238.18b   | 749.4±94.9c    | 4162±457.68a    | 691.6±113.79c   | 1460±241.87b   | 4360±601.12a    |
| PL  | Total PL(nmol/mL)      | 1247.24±37.87c | 2819.89±68.15a | 2708.81±84.25ab | 2527.39±392.02b | 2646.1±62.93ab | 2640.68±54.58ab |
|     | PC(16:0/20:4)(nmol/mL) | 114.7±2.75c    | 223.4±4.12a    | 188±11.6bc      | 186.7±30.1ab    | 203.1±5.14a    | 106.9±1.78c     |
|     | DHA-PL(nmol/mL)        | 105.75±3.46bc  | 114.04±2.88abc | 121.48±27.97ab  | 98.63±16.01c    | 101.31±3.7c    | 125.75±2.81a    |
|     | EPA-PL(nmol/mL)        | 2.64±0.25d     | 10.29±0.47b    | 9.66±1.16b      | 9.17±1.39b      | 7.61±0.65c     | 17.5±1.25a      |
| TAG | Total TAG(nmol/mL)     | 279.57±41.42bc | 358.24±33.29a  | 379.01±45.44a   | 325.86±64.05ab  | 256.87±29.04c  | 268.25±32.11c   |
|     | n-6 PUFA-TAG           | 169.37±26.93a  | 120.3±13.76b   | 120.15±17.48b   | 98.86±19.37b    | 76.38±12.48c   | 45.99±3.97d     |
|     | n-3 PUFA-TAG           | 60.49±7.22b    | 41.22±4.5c     | 40.9±3.96c      | 38.58±8.34c     | 36.75±5.34c    | 80.04±10.13a    |
|     | MUFA-TAG               | 57.96±11.96d   | 183.16±18.99ab | 199.89±26.85a   | 168.06±35.08b   | 135.46±13.63c  | 112.37±15.61c   |
|     | SFA-TAG                | 167.65±24.44bc | 194.69±16.45ab | 215.17±23.38a   | 185.38±34.91ab  | 140.06±11.87c  | 170.33±23.3bc   |

(a, b, c, d, e (p<0.05)); there is no significant difference when the mark contains the same letter
